# Supplementary material
Source: Research Square preprint supplement (doi:10.21203/rs.3.rs-9610327/v1)
Supplement: Supplementary file 1 [file 1723a1fdba6d9c6ea65e33c3.xlsx]

## Sheet: S1
	ITS	ITS1	TCCGTAGGTGAACCTGCG
		ITS4	TCCTCCGCTTATTGATATGC
	BdEF1	BdEF1-F	GCCTTATCACTCTGGTGAGGGG
		BdEF1-R	TCGCATAGACGAACGTGAGTGG
	16S rRNA	515F	GTGYCAGCMGCCGCGGTAA
		806R	GGACTACHVGGGTWTCTAAT
	ITS2	ITS1F	GTGARTCATCGAATCTTTG
		ITS2	TCCTCCGCTTATTGATATGC
	16S rRNA Pse	Pse434F	ACTTTAAGTTGGGAGGAAGGG
		Pse665R	ACACAGGAAATTCCACCACCC
	BOTSDO00477	Bdadh F	TGTCGGTGCTCAGATTGGTG
		Bdadh R	GAAATGGTGCCGTCAGGGTA
	BOTSDO08028	Bdaldh F	AGAACAATGCCGTCCGTCTT
		Bdaldh R	GCCGTTCTCCTCGGGATATG
	BOTSDO12850	Bdaldh3 F	AGGGCTTCTTCATTGCTCCC
		Bdaldh3 R	CGTTGGCATGCTCAATAGCC
	BOTSDO03722	Bdgalm F	CCTGGACAGGGAGGGTATGA
		Bdgalm R	AGCCTCGCAAGCAGTTTTTG
	BOTSDO03220	BdTub F	GTTCAGACCGCCCTTTGCT
		BdTub R	AGCCTTGCGACGGAACATA
	Tub	MdTub_F	AGGATGCTACAGCCGATGAG
		MdTub_R	GCCGAAGAACTGACGAGAATC
	ACS	ACS1_2_6_F	TTAACGAAGGTGCAGGAGATG
		ACS1_2_6_R	AGTTGTCCCAGTTCCAGAATC
	LOX	LOX2S_F	ACATCTTATGGAACTCGTGCG
		LOX2S_R	TTGTCGTAGCATCAACTGGAG
	POD	POD_F	AAGAGATTGTGAGCCGTAGTG
		POD_R	TGAAAGTGCAGTCGAAGGAG
	ACACA	ACACA_F	CATGTTCCAGTCTCACCAAC
		ACACA_R	TGCAGTTCGATTTTCTCCCC
	FAB	FAB2_F	ATTGCCACAGAGAATCAGGAG
		FAB2_R	AGCTGAATGGAACAAGGGAAG
	fad	fadD_F	AGTAACGCCGGACATGATTG
		fadD_R	CTTCCCATCACTACCACTTTCC
	KCS	KCS_F	TGGAGCGATTTGGAGACAC
		KCS_R	TTACACTTGAATCCTGAGCCG
	MKK	MKK3_F	GATGGAGTAGCGATTAGGGTG
		MKK3_R	TCCTGAAACGTACCCATTCG

## Sheet: S2
	Differentially abundant genera identified by ANCOM-BC2 with Holm-adjusted p-values
	taxon	W (W statistic)	p_val	q_val (FDR)			taxon	W (W statistic)	p_val	q_val (FDR)
	Pseudomonas	1534.97	1.68906e-23	3.19233e-21			Botryosphaeria	506.366	1.00996e-18	4.74682e-17
	Staphylococcus	680.164	5.46906e-20	1.02818e-17			Mycosphaerella	208.822	5.86004e-15	2.51982e-13
	Thermicanus	585.241	2.49429e-10	4.31512e-08			Aureobasidium	107.083	3.44306e-12	1.41165e-10
	Methylobacterium	204.811	7.06944e-15	1.32199e-12			Didymella	265.158	5.76165e-16	2.59274e-14
	Microbacterium	200.104	3.00481e-14	5.52884e-12			Alternaria	302.017	1.6177e-16	7.44143e-15
	Tepidiphilus	198.908	6.53984e-09	1.10523e-06			Fungi_Ascomycota_Dothideomycetes_Pleosporales_Unassigned_Unassigned	24.9355	1.1612e-06	4.18032e-05
	Bacteria_Actinobacteria_Actinobacteria_Micrococcales_Microbacteriaceae_Unassigned	192.532	1.28459e-14	2.38935e-12			Penicillium	104.449	1.87166e-06	6.55081e-05
	Acinetobacter	187.617	1.64847e-14	3.04967e-12			Monocillium	54.2694	0.000193812	0.00600819
	hgcI_clade	143.928	5.34989e-07	8.29233e-05			Trichothecium	58.7213	0.000154387	0.0049404
	Bacillus	142.73	2.26953e-13	4.15323e-11			Gibberella	15.8194	0.000360424	0.0108127
	Lactobacillus	123.832	8.74852e-13	1.59223e-10			Fungi_Ascomycota_unidentified_unidentified_unidentified_unidentified	68.4941	9.55944e-06	0.000325021
	Brevibacterium	109.721	7.06525e-12	1.27881e-09			Schizophyllum	204.918	1.68851e-11	6.75405e-10
	Bacteria_Proteobacteria_Alphaproteobacteria_Rhodospirillales_Rhodospirillaceae_Unassigned	94.3493	1.00725e-05	0.00136985			Cystobasidium	33.1001	6.86702e-05	0.00226612
	Pelomonas	91.6654	1.11124e-05	0.00150018			Rhodotorula	172.719	5.70314e-08	2.11016e-06
	Clostridium_sensu_stricto_18	91.6541	1.47253e-11	2.65056e-09			Bullera	131.528	4.93946e-13	2.07457e-11
	Enterococcus	83.3282	8.13423e-11	1.43162e-08			Vishniacozyma	37.5426	4.17999e-08	1.5884e-06
	Bifidobacterium	83.3059	1.90525e-10	3.31513e-08			Fungi_Unassigned_Unassigned_Unassigned_Unassigned_Unassigned	213.551	4.71795e-15	2.0759e-13
	Planomicrobium	82.5036	7.73211e-09	1.29899e-06			Fungi_unidentified_unidentified_unidentified_unidentified_unidentified	79.3528	5.5783e-11	2.17554e-09
	Bacteria_Acidobacteria_Holophagae_Subgroup_7_Unassigned_Unassigned	82.4121	0.000223804	0.0250661
	Anoxybacillus	80.0473	5.14882e-11	9.2164e-09
	Streptococcus	77.3528	7.05142e-11	1.25515e-08
	Leuconostoc	76.61	7.70359e-11	1.36353e-08
	Weissella	75.4969	8.80849e-11	1.54149e-08
	Treponema_2	63.5532	1.00966e-07	1.59526e-05
	Moraxella	61.8823	5.34835e-10	9.19916e-08
	Streptomyces	59.7943	6.33874e-08	1.0142e-05
	Klebsiella	59.4809	7.62653e-10	1.30414e-07
	Clostridium_sensu_stricto_13	56.79	2.76965e-06	0.000407139
	Exiguobacterium	50.532	1.18004e-05	0.00156945
	Paenibacillus	48.8954	4.3198e-09	7.34365e-07
	Achromobacter	46.8225	0.000106484	0.0128846
	Bacteria_Proteobacteria_Gammaproteobacteria_Oceanospirillales_Halomonadaceae_Unassigned	44.7395	9.35262e-09	1.56189e-06
	Lachnospira	44.2085	3.30906e-08	5.36068e-06
	Devosia	43.6238	0.000362436	0.0380558
	Bacteria_Proteobacteria_Betaproteobacteria_Burkholderiales_Comamonadaceae_Unassigned	41.7198	2.95449e-08	4.84537e-06
	Lactococcus	40.6341	2.13732e-08	3.54796e-06
	Lysinibacillus	39.7572	0.000182704	0.021011
	Massilia	39.6352	2.64167e-08	4.35876e-06
	Bacteria_Firmicutes_Clostridia_Clostridiales_Clostridiales_vadinBB60_group_Unassigned	39.2328	1.54148e-05	0.00201933
	Ruminococcaceae_UCG-005	38.8098	3.15789e-08	5.14736e-06
	Parabacteroides	38.4591	0.000203729	0.0230214
	Lachnospiraceae_NK4A136_group	38.0745	3.71228e-08	5.97677e-06
	Altererythrobacter	35.2802	2.50034e-05	0.00322544
	Thauera	34.2326	0.000297947	0.0324762
	Sphingomonas	33.9693	9.64146e-08	1.53299e-05
	Bacteria_Proteobacteria_Betaproteobacteria_Burkholderiales_Unassigned_Unassigned	33.6758	0.000314259	0.03394
	Rubellimicrobium	33.5918	0.000139699	0.0167638
	Moheibacter	33.4125	0.000142475	0.0169545
	Raoultella	33.3116	1.13339e-07	1.77942e-05
	[Eubacterium]_oxidoreducens_group	32.4664	0.000158317	0.0184326
	Psychrobacter	31.9341	2.52522e-07	3.93935e-05
	Alkalibacterium	30.7558	0.000192982	0.022
	Atopostipes	30.6505	7.29984e-06	0.00102198
	Pasteurella	29.6574	2.9925e-06	0.000436905
	Succinivibrio	29.5358	7.23798e-07	0.000111465
	Intestinibacter	27.4512	8.0264e-06	0.00111567
	Desulfovibrio	27.4423	8.04183e-06	0.00111567
	Bacteria_Proteobacteria_Betaproteobacteria_Burkholderiales_Oxalobacteraceae_Unassigned	27.1256	5.25539e-06	0.00074101
	Faecalibacterium	26.0811	8.16675e-07	0.000124951
	Roseburia	24.8619	3.80592e-06	0.000548053
	Ruminococcaceae_UCG-010	24.6358	1.27584e-06	0.000193928
	Alistipes	24.3178	1.41127e-06	0.000213101
	Mycoplasma	23.9832	2.25393e-06	0.000335836
	Chryseobacterium	23.9665	3.30003e-06	0.000478505
	Propionibacterium	23.6352	2.5118e-06	0.000371746
	Vibrio	23.4269	1.88253e-06	0.00028238
	Janibacter	22.1679	4.02198e-06	0.000575143
	Escherichia-Shigella	20.9637	4.37187e-06	0.000620806
	Stenotrophomonas	19.1369	1.15271e-05	0.00154463
	Bacteria_Proteobacteria_Gammaproteobacteria_Unassigned_Unassigned_Unassigned	19.1077	8.67361e-06	0.00118829
	Rikenellaceae_RC9_gut_group	18.7558	3.45443e-05	0.00438712
	Bacteria_Firmicutes_Clostridia_Clostridiales_Lachnospiraceae_Unassigned	18.6831	1.36377e-05	0.00180017
	Snodgrassella	17.5702	2.0867e-05	0.00271271
	Bacteria_Firmicutes_Clostridia_Clostridiales_Ruminococcaceae_Unassigned	16.6624	2.99556e-05	0.00383432
	Bacteria_Proteobacteria_Gammaproteobacteria_Xanthomonadales_Xanthomonadaceae_Unassigned	16.2285	0.000156208	0.0184326
	Pantoea	15.6389	3.59162e-05	0.00452544
	Planococcus	15.3874	4.01441e-05	0.00501801
	Ruminococcaceae_UCG-014	14.9022	0.000245165	0.0269681
	Rhizobium	14.8884	6.3328e-05	0.00785267
	Paracocccus	14.1164	7.183e-05	0.00883509
	Natronobacillus_azotifigens	13.8804	9.96121e-05	0.0121527
	Marinobacter	13.3893	0.000323751	0.0346414
	Bacteroides	12.5289	0.000156257	0.0184326
	Allobaculum	11.7639	0.000232415	0.0257981
	Zymobacter	11.7134	0.000344863	0.0365555

## Sheet: S3
	Heatmap of the top 10 most abundant and differentially expressed genera
	OTU	Sample	Abundance	SampleID	Group	Pathogen	G1VOC	Kingdom	Phylum	Class	Order	Family	Genus			OTU	Sample	Abundance	SampleID	Group	Pathogen	G1VOC	Kingdom	Phylum	Class	Order	Family	Genus
	ASV_4	BG1	0.00528009	BG1	BG	Yes	Yes	Bacteria	Proteobacteria	Gammaproteobacteria	Pseudomonadales	Moraxellaceae	Acinetobacter			ASV_2	BG1	0.0352206	BG1	BG	Yes	Yes	Fungi	Ascomycota	Dothideomycetes	Pleosporales	Pleosporaceae	Alternaria
	ASV_4	BG2	0.004953	BG2	BG	Yes	Yes	Bacteria	Proteobacteria	Gammaproteobacteria	Pseudomonadales	Moraxellaceae	Acinetobacter			ASV_2	BG2	0.0352196	BG2	BG	Yes	Yes	Fungi	Ascomycota	Dothideomycetes	Pleosporales	Pleosporaceae	Alternaria
	ASV_4	BG3	0.00493768	BG3	BG	Yes	Yes	Bacteria	Proteobacteria	Gammaproteobacteria	Pseudomonadales	Moraxellaceae	Acinetobacter			ASV_2	BG3	0.0335103	BG3	BG	Yes	Yes	Fungi	Ascomycota	Dothideomycetes	Pleosporales	Pleosporaceae	Alternaria
	ASV_4	BG4	0.00581729	BG4	BG	Yes	Yes	Bacteria	Proteobacteria	Gammaproteobacteria	Pseudomonadales	Moraxellaceae	Acinetobacter			ASV_2	BG4	0.0258262	BG4	BG	Yes	Yes	Fungi	Ascomycota	Dothideomycetes	Pleosporales	Pleosporaceae	Alternaria
	ASV_4	BG5	0.00611947	BG5	BG	Yes	Yes	Bacteria	Proteobacteria	Gammaproteobacteria	Pseudomonadales	Moraxellaceae	Acinetobacter			ASV_2	BG5	0.0347359	BG5	BG	Yes	Yes	Fungi	Ascomycota	Dothideomycetes	Pleosporales	Pleosporaceae	Alternaria
	ASV_4	BG6	0.00567435	BG6	BG	Yes	Yes	Bacteria	Proteobacteria	Gammaproteobacteria	Pseudomonadales	Moraxellaceae	Acinetobacter			ASV_2	BG6	0.0270786	BG6	BG	Yes	Yes	Fungi	Ascomycota	Dothideomycetes	Pleosporales	Pleosporaceae	Alternaria
	ASV_5	BG1	0.008684	BG1	BG	Yes	Yes	Bacteria	Firmicutes	Bacilli	Bacillales	Bacillaceae	Anoxybacillus			ASV_2	BM1	0.00395387	BM1	BM	Yes	No	Fungi	Ascomycota	Dothideomycetes	Pleosporales	Pleosporaceae	Alternaria
	ASV_5	BG2	0.0115304	BG2	BG	Yes	Yes	Bacteria	Firmicutes	Bacilli	Bacillales	Bacillaceae	Anoxybacillus			ASV_2	BM2	0.00671425	BM2	BM	Yes	No	Fungi	Ascomycota	Dothideomycetes	Pleosporales	Pleosporaceae	Alternaria
	ASV_5	BG3	0.00961132	BG3	BG	Yes	Yes	Bacteria	Firmicutes	Bacilli	Bacillales	Bacillaceae	Anoxybacillus			ASV_2	BM3	0.00572489	BM3	BM	Yes	No	Fungi	Ascomycota	Dothideomycetes	Pleosporales	Pleosporaceae	Alternaria
	ASV_5	BG4	0.0108699	BG4	BG	Yes	Yes	Bacteria	Firmicutes	Bacilli	Bacillales	Bacillaceae	Anoxybacillus			ASV_2	BM4	0.00519883	BM4	BM	Yes	No	Fungi	Ascomycota	Dothideomycetes	Pleosporales	Pleosporaceae	Alternaria
	ASV_5	BG5	0.011094	BG5	BG	Yes	Yes	Bacteria	Firmicutes	Bacilli	Bacillales	Bacillaceae	Anoxybacillus			ASV_2	BM5	0.00590437	BM5	BM	Yes	No	Fungi	Ascomycota	Dothideomycetes	Pleosporales	Pleosporaceae	Alternaria
	ASV_5	BG6	0.0110133	BG6	BG	Yes	Yes	Bacteria	Firmicutes	Bacilli	Bacillales	Bacillaceae	Anoxybacillus			ASV_2	BM6	0.00774507	BM6	BM	Yes	No	Fungi	Ascomycota	Dothideomycetes	Pleosporales	Pleosporaceae	Alternaria
	ASV_3	BG1	0.0209327	BG1	BG	Yes	Yes	Bacteria	Firmicutes	Bacilli	Bacillales	Bacillaceae	Bacillus			ASV_2	WG1	0.621574	WG1	WG	No	Yes	Fungi	Ascomycota	Dothideomycetes	Pleosporales	Pleosporaceae	Alternaria
	ASV_3	BG2	0.0244721	BG2	BG	Yes	Yes	Bacteria	Firmicutes	Bacilli	Bacillales	Bacillaceae	Bacillus			ASV_2	WG2	0.650318	WG2	WG	No	Yes	Fungi	Ascomycota	Dothideomycetes	Pleosporales	Pleosporaceae	Alternaria
	ASV_3	BG3	0.0199092	BG3	BG	Yes	Yes	Bacteria	Firmicutes	Bacilli	Bacillales	Bacillaceae	Bacillus			ASV_2	WG3	0.651257	WG3	WG	No	Yes	Fungi	Ascomycota	Dothideomycetes	Pleosporales	Pleosporaceae	Alternaria
	ASV_3	BG4	0.0234467	BG4	BG	Yes	Yes	Bacteria	Firmicutes	Bacilli	Bacillales	Bacillaceae	Bacillus			ASV_2	WG4	0.657036	WG4	WG	No	Yes	Fungi	Ascomycota	Dothideomycetes	Pleosporales	Pleosporaceae	Alternaria
	ASV_3	BG5	0.025149	BG5	BG	Yes	Yes	Bacteria	Firmicutes	Bacilli	Bacillales	Bacillaceae	Bacillus			ASV_2	WG5	0.63691	WG5	WG	No	Yes	Fungi	Ascomycota	Dothideomycetes	Pleosporales	Pleosporaceae	Alternaria
	ASV_3	BG6	0.0242669	BG6	BG	Yes	Yes	Bacteria	Firmicutes	Bacilli	Bacillales	Bacillaceae	Bacillus			ASV_2	WG6	0.667576	WG6	WG	No	Yes	Fungi	Ascomycota	Dothideomycetes	Pleosporales	Pleosporaceae	Alternaria
	ASV_7	BG1	0.00554811	BG1	BG	Yes	Yes	Bacteria	Firmicutes	Clostridia	Clostridiales	Clostridiaceae_1	Clostridium_sensu_stricto_18			ASV_2	WM1	0.754135	WM1	WM	No	No	Fungi	Ascomycota	Dothideomycetes	Pleosporales	Pleosporaceae	Alternaria
	ASV_7	BG2	0.00541901	BG2	BG	Yes	Yes	Bacteria	Firmicutes	Clostridia	Clostridiales	Clostridiaceae_1	Clostridium_sensu_stricto_18			ASV_2	WM2	0.764014	WM2	WM	No	No	Fungi	Ascomycota	Dothideomycetes	Pleosporales	Pleosporaceae	Alternaria
	ASV_7	BG3	0.00385509	BG3	BG	Yes	Yes	Bacteria	Firmicutes	Clostridia	Clostridiales	Clostridiaceae_1	Clostridium_sensu_stricto_18			ASV_2	WM3	0.748775	WM3	WM	No	No	Fungi	Ascomycota	Dothideomycetes	Pleosporales	Pleosporaceae	Alternaria
	ASV_7	BG4	0.0059675	BG4	BG	Yes	Yes	Bacteria	Firmicutes	Clostridia	Clostridiales	Clostridiaceae_1	Clostridium_sensu_stricto_18			ASV_2	WM4	0.77984	WM4	WM	No	No	Fungi	Ascomycota	Dothideomycetes	Pleosporales	Pleosporaceae	Alternaria
	ASV_7	BG5	0.00515878	BG5	BG	Yes	Yes	Bacteria	Firmicutes	Clostridia	Clostridiales	Clostridiaceae_1	Clostridium_sensu_stricto_18			ASV_2	WM5	0.712592	WM5	WM	No	No	Fungi	Ascomycota	Dothideomycetes	Pleosporales	Pleosporaceae	Alternaria
	ASV_7	BG6	0.00545972	BG6	BG	Yes	Yes	Bacteria	Firmicutes	Clostridia	Clostridiales	Clostridiaceae_1	Clostridium_sensu_stricto_18			ASV_2	WM6	0.675378	WM6	WM	No	No	Fungi	Ascomycota	Dothideomycetes	Pleosporales	Pleosporaceae	Alternaria
	ASV_11	BG1	0.00289467	BG1	BG	Yes	Yes	Bacteria	Proteobacteria	Gammaproteobacteria	Enterobacteriales	Enterobacteriaceae	Klebsiella			ASV_6	BG1	0.00653097	BG1	BG	Yes	Yes	Fungi	Ascomycota	Dothideomycetes	Dothideales	Aureobasidiaceae	Aureobasidium
	ASV_11	BG2	0.00314223	BG2	BG	Yes	Yes	Bacteria	Proteobacteria	Gammaproteobacteria	Enterobacteriales	Enterobacteriaceae	Klebsiella			ASV_6	BG2	0.00633037	BG2	BG	Yes	Yes	Fungi	Ascomycota	Dothideomycetes	Dothideales	Aureobasidiaceae	Aureobasidium
	ASV_11	BG3	0.00380228	BG3	BG	Yes	Yes	Bacteria	Proteobacteria	Gammaproteobacteria	Enterobacteriales	Enterobacteriaceae	Klebsiella			ASV_6	BG3	0.00638667	BG3	BG	Yes	Yes	Fungi	Ascomycota	Dothideomycetes	Dothideales	Aureobasidiaceae	Aureobasidium
	ASV_11	BG4	0.00273112	BG4	BG	Yes	Yes	Bacteria	Proteobacteria	Gammaproteobacteria	Enterobacteriales	Enterobacteriaceae	Klebsiella			ASV_6	BG4	0.00530199	BG4	BG	Yes	Yes	Fungi	Ascomycota	Dothideomycetes	Dothideales	Aureobasidiaceae	Aureobasidium
	ASV_11	BG5	0.0022109	BG5	BG	Yes	Yes	Bacteria	Proteobacteria	Gammaproteobacteria	Enterobacteriales	Enterobacteriaceae	Klebsiella			ASV_6	BG5	0.00737854	BG5	BG	Yes	Yes	Fungi	Ascomycota	Dothideomycetes	Dothideales	Aureobasidiaceae	Aureobasidium
	ASV_11	BG6	0.00198535	BG6	BG	Yes	Yes	Bacteria	Proteobacteria	Gammaproteobacteria	Enterobacteriales	Enterobacteriaceae	Klebsiella			ASV_6	BG6	0.0060244	BG6	BG	Yes	Yes	Fungi	Ascomycota	Dothideomycetes	Dothideales	Aureobasidiaceae	Aureobasidium
	ASV_16	BG1	0.0117797	BG1	BG	Yes	Yes	Bacteria	Proteobacteria	Alphaproteobacteria	Rhizobiales	Methylobacteriaceae	Methylobacterium			ASV_6	BM1	0.00148737	BM1	BM	Yes	No	Fungi	Ascomycota	Dothideomycetes	Dothideales	Aureobasidiaceae	Aureobasidium
	ASV_16	BG2	0.00958645	BG2	BG	Yes	Yes	Bacteria	Proteobacteria	Alphaproteobacteria	Rhizobiales	Methylobacteriaceae	Methylobacterium			ASV_6	BM2	0.00176309	BM2	BM	Yes	No	Fungi	Ascomycota	Dothideomycetes	Dothideales	Aureobasidiaceae	Aureobasidium
	ASV_16	BG3	0.0102582	BG3	BG	Yes	Yes	Bacteria	Proteobacteria	Alphaproteobacteria	Rhizobiales	Methylobacteriaceae	Methylobacterium			ASV_6	BM3	0.00161127	BM3	BM	Yes	No	Fungi	Ascomycota	Dothideomycetes	Dothideales	Aureobasidiaceae	Aureobasidium
	ASV_16	BG4	0.00902636	BG4	BG	Yes	Yes	Bacteria	Proteobacteria	Alphaproteobacteria	Rhizobiales	Methylobacteriaceae	Methylobacterium			ASV_6	BM4	0.00151434	BM4	BM	Yes	No	Fungi	Ascomycota	Dothideomycetes	Dothideales	Aureobasidiaceae	Aureobasidium
	ASV_16	BG5	0.00877782	BG5	BG	Yes	Yes	Bacteria	Proteobacteria	Alphaproteobacteria	Rhizobiales	Methylobacteriaceae	Methylobacterium			ASV_6	BM5	0.0019008	BM5	BM	Yes	No	Fungi	Ascomycota	Dothideomycetes	Dothideales	Aureobasidiaceae	Aureobasidium
	ASV_16	BG6	0.00886701	BG6	BG	Yes	Yes	Bacteria	Proteobacteria	Alphaproteobacteria	Rhizobiales	Methylobacteriaceae	Methylobacterium			ASV_6	BM6	0.00260924	BM6	BM	Yes	No	Fungi	Ascomycota	Dothideomycetes	Dothideales	Aureobasidiaceae	Aureobasidium
	ASV_15	BG1	0.00142053	BG1	BG	Yes	Yes	Bacteria	Proteobacteria	Gammaproteobacteria	Enterobacteriales	Enterobacteriaceae	Pantoea			ASV_6	WG1	0.114993	WG1	WG	No	Yes	Fungi	Ascomycota	Dothideomycetes	Dothideales	Aureobasidiaceae	Aureobasidium
	ASV_15	BG2	0.00210369	BG2	BG	Yes	Yes	Bacteria	Proteobacteria	Gammaproteobacteria	Enterobacteriales	Enterobacteriaceae	Pantoea			ASV_6	WG2	0.0824776	WG2	WG	No	Yes	Fungi	Ascomycota	Dothideomycetes	Dothideales	Aureobasidiaceae	Aureobasidium
	ASV_15	BG3	0.00909643	BG3	BG	Yes	Yes	Bacteria	Proteobacteria	Gammaproteobacteria	Enterobacteriales	Enterobacteriaceae	Pantoea			ASV_6	WG3	0.100305	WG3	WG	No	Yes	Fungi	Ascomycota	Dothideomycetes	Dothideales	Aureobasidiaceae	Aureobasidium
	ASV_15	BG4	0.0013519	BG4	BG	Yes	Yes	Bacteria	Proteobacteria	Gammaproteobacteria	Enterobacteriales	Enterobacteriaceae	Pantoea			ASV_6	WG4	0.104738	WG4	WG	No	Yes	Fungi	Ascomycota	Dothideomycetes	Dothideales	Aureobasidiaceae	Aureobasidium
	ASV_15	BG5	0.00132917	BG5	BG	Yes	Yes	Bacteria	Proteobacteria	Gammaproteobacteria	Enterobacteriales	Enterobacteriaceae	Pantoea			ASV_6	WG5	0.0836733	WG5	WG	No	Yes	Fungi	Ascomycota	Dothideomycetes	Dothideales	Aureobasidiaceae	Aureobasidium
	ASV_15	BG6	0.00124755	BG6	BG	Yes	Yes	Bacteria	Proteobacteria	Gammaproteobacteria	Enterobacteriales	Enterobacteriaceae	Pantoea			ASV_6	WG6	0.0973401	WG6	WG	No	Yes	Fungi	Ascomycota	Dothideomycetes	Dothideales	Aureobasidiaceae	Aureobasidium
	ASV_2	BG1	0.918815	BG1	BG	Yes	Yes	Bacteria	Proteobacteria	Gammaproteobacteria	Pseudomonadales	Pseudomonadaceae	Pseudomonas			ASV_6	WM1	0.0354857	WM1	WM	No	No	Fungi	Ascomycota	Dothideomycetes	Dothideales	Aureobasidiaceae	Aureobasidium
	ASV_2	BG2	0.914175	BG2	BG	Yes	Yes	Bacteria	Proteobacteria	Gammaproteobacteria	Pseudomonadales	Pseudomonadaceae	Pseudomonas			ASV_6	WM2	0.0282942	WM2	WM	No	No	Fungi	Ascomycota	Dothideomycetes	Dothideales	Aureobasidiaceae	Aureobasidium
	ASV_2	BG3	0.909326	BG3	BG	Yes	Yes	Bacteria	Proteobacteria	Gammaproteobacteria	Pseudomonadales	Pseudomonadaceae	Pseudomonas			ASV_6	WM3	0.0363086	WM3	WM	No	No	Fungi	Ascomycota	Dothideomycetes	Dothideales	Aureobasidiaceae	Aureobasidium
	ASV_2	BG4	0.918299	BG4	BG	Yes	Yes	Bacteria	Proteobacteria	Gammaproteobacteria	Pseudomonadales	Pseudomonadaceae	Pseudomonas			ASV_6	WM4	0.0284201	WM4	WM	No	No	Fungi	Ascomycota	Dothideomycetes	Dothideales	Aureobasidiaceae	Aureobasidium
	ASV_2	BG5	0.917604	BG5	BG	Yes	Yes	Bacteria	Proteobacteria	Gammaproteobacteria	Pseudomonadales	Pseudomonadaceae	Pseudomonas			ASV_6	WM5	0.027354	WM5	WM	No	No	Fungi	Ascomycota	Dothideomycetes	Dothideales	Aureobasidiaceae	Aureobasidium
	ASV_2	BG6	0.918882	BG6	BG	Yes	Yes	Bacteria	Proteobacteria	Gammaproteobacteria	Pseudomonadales	Pseudomonadaceae	Pseudomonas			ASV_6	WM6	0.0387451	WM6	WM	No	No	Fungi	Ascomycota	Dothideomycetes	Dothideales	Aureobasidiaceae	Aureobasidium
	ASV_8	BG1	0.00138033	BG1	BG	Yes	Yes	Bacteria	Firmicutes	Bacilli	Bacillales	Staphylococcaceae	Staphylococcus			ASV_1	BG1	0.926379	BG1	BG	Yes	Yes	Fungi	Ascomycota	Dothideomycetes	Botryosphaeriales	Botryosphaeriaceae	Botryosphaeria
	ASV_8	BG2	0.000252976	BG2	BG	Yes	Yes	Bacteria	Firmicutes	Bacilli	Bacillales	Staphylococcaceae	Staphylococcus			ASV_1	BG2	0.92712	BG2	BG	Yes	Yes	Fungi	Ascomycota	Dothideomycetes	Botryosphaeriales	Botryosphaeriaceae	Botryosphaeria
	ASV_8	BG3	0.000818547	BG3	BG	Yes	Yes	Bacteria	Firmicutes	Bacilli	Bacillales	Staphylococcaceae	Staphylococcus			ASV_1	BG3	0.934333	BG3	BG	Yes	Yes	Fungi	Ascomycota	Dothideomycetes	Botryosphaeriales	Botryosphaeriaceae	Botryosphaeria
	ASV_8	BG4	0.000600847	BG4	BG	Yes	Yes	Bacteria	Firmicutes	Bacilli	Bacillales	Staphylococcaceae	Staphylococcus			ASV_1	BG4	0.944749	BG4	BG	Yes	Yes	Fungi	Ascomycota	Dothideomycetes	Botryosphaeriales	Botryosphaeriaceae	Botryosphaeria
	ASV_8	BG5	0.000500086	BG5	BG	Yes	Yes	Bacteria	Firmicutes	Bacilli	Bacillales	Staphylococcaceae	Staphylococcus			ASV_1	BG5	0.92431	BG5	BG	Yes	Yes	Fungi	Ascomycota	Dothideomycetes	Botryosphaeriales	Botryosphaeriaceae	Botryosphaeria
	ASV_8	BG6	0.000375607	BG6	BG	Yes	Yes	Bacteria	Firmicutes	Bacilli	Bacillales	Staphylococcaceae	Staphylococcus			ASV_1	BG6	0.937137	BG6	BG	Yes	Yes	Fungi	Ascomycota	Dothideomycetes	Botryosphaeriales	Botryosphaeriaceae	Botryosphaeria
	ASV_12	BG1	0.00202359	BG1	BG	Yes	Yes	Bacteria	Firmicutes	Bacilli	Lactobacillales	Streptococcaceae	Streptococcus			ASV_1	BM1	0.988385	BM1	BM	Yes	No	Fungi	Ascomycota	Dothideomycetes	Botryosphaeriales	Botryosphaeriaceae	Botryosphaeria
	ASV_12	BG2	0.00283599	BG2	BG	Yes	Yes	Bacteria	Firmicutes	Bacilli	Lactobacillales	Streptococcaceae	Streptococcus			ASV_1	BM2	0.984531	BM2	BM	Yes	No	Fungi	Ascomycota	Dothideomycetes	Botryosphaeriales	Botryosphaeriaceae	Botryosphaeria
	ASV_12	BG3	0.00217839	BG3	BG	Yes	Yes	Bacteria	Firmicutes	Bacilli	Lactobacillales	Streptococcaceae	Streptococcus			ASV_1	BM3	0.984266	BM3	BM	Yes	No	Fungi	Ascomycota	Dothideomycetes	Botryosphaeriales	Botryosphaeriaceae	Botryosphaeria
	ASV_12	BG4	0.00259457	BG4	BG	Yes	Yes	Bacteria	Firmicutes	Bacilli	Lactobacillales	Streptococcaceae	Streptococcus			ASV_1	BM4	0.98531	BM4	BM	Yes	No	Fungi	Ascomycota	Dothideomycetes	Botryosphaeriales	Botryosphaeriaceae	Botryosphaeria
	ASV_12	BG5	0.00231619	BG5	BG	Yes	Yes	Bacteria	Firmicutes	Bacilli	Lactobacillales	Streptococcaceae	Streptococcus			ASV_1	BM5	0.984342	BM5	BM	Yes	No	Fungi	Ascomycota	Dothideomycetes	Botryosphaeriales	Botryosphaeriaceae	Botryosphaeria
	ASV_12	BG6	0.00246827	BG6	BG	Yes	Yes	Bacteria	Firmicutes	Bacilli	Lactobacillales	Streptococcaceae	Streptococcus			ASV_1	BM6	0.978784	BM6	BM	Yes	No	Fungi	Ascomycota	Dothideomycetes	Botryosphaeriales	Botryosphaeriaceae	Botryosphaeria
	ASV_4	BM1	0.0356605	BM1	BM	Yes	No	Bacteria	Proteobacteria	Gammaproteobacteria	Pseudomonadales	Moraxellaceae	Acinetobacter			ASV_1	WG1	0.00529667	WG1	WG	No	Yes	Fungi	Ascomycota	Dothideomycetes	Botryosphaeriales	Botryosphaeriaceae	Botryosphaeria
	ASV_4	BM2	0.0344457	BM2	BM	Yes	No	Bacteria	Proteobacteria	Gammaproteobacteria	Pseudomonadales	Moraxellaceae	Acinetobacter			ASV_1	WG2	0.00497468	WG2	WG	No	Yes	Fungi	Ascomycota	Dothideomycetes	Botryosphaeriales	Botryosphaeriaceae	Botryosphaeria
	ASV_4	BM3	0.0347736	BM3	BM	Yes	No	Bacteria	Proteobacteria	Gammaproteobacteria	Pseudomonadales	Moraxellaceae	Acinetobacter			ASV_1	WG3	0.00509033	WG3	WG	No	Yes	Fungi	Ascomycota	Dothideomycetes	Botryosphaeriales	Botryosphaeriaceae	Botryosphaeria
	ASV_4	BM4	0.0437927	BM4	BM	Yes	No	Bacteria	Proteobacteria	Gammaproteobacteria	Pseudomonadales	Moraxellaceae	Acinetobacter			ASV_1	WG4	0.00446682	WG4	WG	No	Yes	Fungi	Ascomycota	Dothideomycetes	Botryosphaeriales	Botryosphaeriaceae	Botryosphaeria
	ASV_4	BM5	0.0320921	BM5	BM	Yes	No	Bacteria	Proteobacteria	Gammaproteobacteria	Pseudomonadales	Moraxellaceae	Acinetobacter			ASV_1	WG5	0.0062654	WG5	WG	No	Yes	Fungi	Ascomycota	Dothideomycetes	Botryosphaeriales	Botryosphaeriaceae	Botryosphaeria
	ASV_4	BM6	0.0354269	BM6	BM	Yes	No	Bacteria	Proteobacteria	Gammaproteobacteria	Pseudomonadales	Moraxellaceae	Acinetobacter			ASV_1	WG6	0.00573376	WG6	WG	No	Yes	Fungi	Ascomycota	Dothideomycetes	Botryosphaeriales	Botryosphaeriaceae	Botryosphaeria
	ASV_5	BM1	0.0559874	BM1	BM	Yes	No	Bacteria	Firmicutes	Bacilli	Bacillales	Bacillaceae	Anoxybacillus			ASV_1	WM1	0.00945908	WM1	WM	No	No	Fungi	Ascomycota	Dothideomycetes	Botryosphaeriales	Botryosphaeriaceae	Botryosphaeria
	ASV_5	BM2	0.0598932	BM2	BM	Yes	No	Bacteria	Firmicutes	Bacilli	Bacillales	Bacillaceae	Anoxybacillus			ASV_1	WM2	0.0112194	WM2	WM	No	No	Fungi	Ascomycota	Dothideomycetes	Botryosphaeriales	Botryosphaeriaceae	Botryosphaeria
	ASV_5	BM3	0.0547182	BM3	BM	Yes	No	Bacteria	Firmicutes	Bacilli	Bacillales	Bacillaceae	Anoxybacillus			ASV_1	WM3	0.00750905	WM3	WM	No	No	Fungi	Ascomycota	Dothideomycetes	Botryosphaeriales	Botryosphaeriaceae	Botryosphaeria
	ASV_5	BM4	0.0599842	BM4	BM	Yes	No	Bacteria	Firmicutes	Bacilli	Bacillales	Bacillaceae	Anoxybacillus			ASV_1	WM4	0.00797509	WM4	WM	No	No	Fungi	Ascomycota	Dothideomycetes	Botryosphaeriales	Botryosphaeriaceae	Botryosphaeria
	ASV_5	BM5	0.0586015	BM5	BM	Yes	No	Bacteria	Firmicutes	Bacilli	Bacillales	Bacillaceae	Anoxybacillus			ASV_1	WM5	0.00905433	WM5	WM	No	No	Fungi	Ascomycota	Dothideomycetes	Botryosphaeriales	Botryosphaeriaceae	Botryosphaeria
	ASV_5	BM6	0.0670908	BM6	BM	Yes	No	Bacteria	Firmicutes	Bacilli	Bacillales	Bacillaceae	Anoxybacillus			ASV_1	WM6	0.00761597	WM6	WM	No	No	Fungi	Ascomycota	Dothideomycetes	Botryosphaeriales	Botryosphaeriaceae	Botryosphaeria
	ASV_3	BM1	0.152682	BM1	BM	Yes	No	Bacteria	Firmicutes	Bacilli	Bacillales	Bacillaceae	Bacillus			ASV_27	BG1	3.68288e-05	BG1	BG	Yes	Yes	Fungi	Basidiomycota	Tremellomycetes	Tremellales	Bulleraceae	Bullera
	ASV_3	BM2	0.16423	BM2	BM	Yes	No	Bacteria	Firmicutes	Bacilli	Bacillales	Bacillaceae	Bacillus			ASV_27	BG2	8.67174e-05	BG2	BG	Yes	Yes	Fungi	Basidiomycota	Tremellomycetes	Tremellales	Bulleraceae	Bullera
	ASV_3	BM3	0.146541	BM3	BM	Yes	No	Bacteria	Firmicutes	Bacilli	Bacillales	Bacillaceae	Bacillus			ASV_27	BG3	9.19891e-05	BG3	BG	Yes	Yes	Fungi	Basidiomycota	Tremellomycetes	Tremellales	Bulleraceae	Bullera
	ASV_3	BM4	0.168459	BM4	BM	Yes	No	Bacteria	Firmicutes	Bacilli	Bacillales	Bacillaceae	Bacillus			ASV_27	BG4	4.79818e-05	BG4	BG	Yes	Yes	Fungi	Basidiomycota	Tremellomycetes	Tremellales	Bulleraceae	Bullera
	ASV_3	BM5	0.152806	BM5	BM	Yes	No	Bacteria	Firmicutes	Bacilli	Bacillales	Bacillaceae	Bacillus			ASV_27	BG5	0.000138742	BG5	BG	Yes	Yes	Fungi	Basidiomycota	Tremellomycetes	Tremellales	Bulleraceae	Bullera
	ASV_3	BM6	0.163355	BM6	BM	Yes	No	Bacteria	Firmicutes	Bacilli	Bacillales	Bacillaceae	Bacillus			ASV_27	BG6	6.23644e-05	BG6	BG	Yes	Yes	Fungi	Basidiomycota	Tremellomycetes	Tremellales	Bulleraceae	Bullera
	ASV_7	BM1	0.0321547	BM1	BM	Yes	No	Bacteria	Firmicutes	Clostridia	Clostridiales	Clostridiaceae_1	Clostridium_sensu_stricto_18			ASV_27	BM1	0.000127062	BM1	BM	Yes	No	Fungi	Basidiomycota	Tremellomycetes	Tremellales	Bulleraceae	Bullera
	ASV_7	BM2	0.0384071	BM2	BM	Yes	No	Bacteria	Firmicutes	Clostridia	Clostridiales	Clostridiaceae_1	Clostridium_sensu_stricto_18			ASV_27	BM2	0.000108684	BM2	BM	Yes	No	Fungi	Basidiomycota	Tremellomycetes	Tremellales	Bulleraceae	Bullera
	ASV_7	BM3	0.0313578	BM3	BM	Yes	No	Bacteria	Firmicutes	Clostridia	Clostridiales	Clostridiaceae_1	Clostridium_sensu_stricto_18			ASV_27	BM3	0.000146479	BM3	BM	Yes	No	Fungi	Basidiomycota	Tremellomycetes	Tremellales	Bulleraceae	Bullera
	ASV_7	BM4	0.0376516	BM4	BM	Yes	No	Bacteria	Firmicutes	Clostridia	Clostridiales	Clostridiaceae_1	Clostridium_sensu_stricto_18			ASV_27	BM4	0.000155011	BM4	BM	Yes	No	Fungi	Basidiomycota	Tremellomycetes	Tremellales	Bulleraceae	Bullera
	ASV_7	BM5	0.0388511	BM5	BM	Yes	No	Bacteria	Firmicutes	Clostridia	Clostridiales	Clostridiaceae_1	Clostridium_sensu_stricto_18			ASV_27	BM5	0.00019008	BM5	BM	Yes	No	Fungi	Basidiomycota	Tremellomycetes	Tremellales	Bulleraceae	Bullera
	ASV_7	BM6	0.0363229	BM6	BM	Yes	No	Bacteria	Firmicutes	Clostridia	Clostridiales	Clostridiaceae_1	Clostridium_sensu_stricto_18			ASV_27	BM6	0.000212517	BM6	BM	Yes	No	Fungi	Basidiomycota	Tremellomycetes	Tremellales	Bulleraceae	Bullera
	ASV_11	BM1	0.0216725	BM1	BM	Yes	No	Bacteria	Proteobacteria	Gammaproteobacteria	Enterobacteriales	Enterobacteriaceae	Klebsiella			ASV_27	WG1	0.014441	WG1	WG	No	Yes	Fungi	Basidiomycota	Tremellomycetes	Tremellales	Bulleraceae	Bullera
	ASV_11	BM2	0.0182415	BM2	BM	Yes	No	Bacteria	Proteobacteria	Gammaproteobacteria	Enterobacteriales	Enterobacteriaceae	Klebsiella			ASV_27	WG2	0.0107147	WG2	WG	No	Yes	Fungi	Basidiomycota	Tremellomycetes	Tremellales	Bulleraceae	Bullera
	ASV_11	BM3	0.0150718	BM3	BM	Yes	No	Bacteria	Proteobacteria	Gammaproteobacteria	Enterobacteriales	Enterobacteriaceae	Klebsiella			ASV_27	WG3	0.00792236	WG3	WG	No	Yes	Fungi	Basidiomycota	Tremellomycetes	Tremellales	Bulleraceae	Bullera
	ASV_11	BM4	0.0162083	BM4	BM	Yes	No	Bacteria	Proteobacteria	Gammaproteobacteria	Enterobacteriales	Enterobacteriaceae	Klebsiella			ASV_27	WG4	0.0142654	WG4	WG	No	Yes	Fungi	Basidiomycota	Tremellomycetes	Tremellales	Bulleraceae	Bullera
	ASV_11	BM5	0.016169	BM5	BM	Yes	No	Bacteria	Proteobacteria	Gammaproteobacteria	Enterobacteriales	Enterobacteriaceae	Klebsiella			ASV_27	WG5	0.0147793	WG5	WG	No	Yes	Fungi	Basidiomycota	Tremellomycetes	Tremellales	Bulleraceae	Bullera
	ASV_11	BM6	0.0145865	BM6	BM	Yes	No	Bacteria	Proteobacteria	Gammaproteobacteria	Enterobacteriales	Enterobacteriaceae	Klebsiella			ASV_27	WG6	0.0109319	WG6	WG	No	Yes	Fungi	Basidiomycota	Tremellomycetes	Tremellales	Bulleraceae	Bullera
	ASV_16	BM1	0.0044797	BM1	BM	Yes	No	Bacteria	Proteobacteria	Alphaproteobacteria	Rhizobiales	Methylobacteriaceae	Methylobacterium			ASV_27	WM1	0.00250637	WM1	WM	No	No	Fungi	Basidiomycota	Tremellomycetes	Tremellales	Bulleraceae	Bullera
	ASV_16	BM2	0.00448963	BM2	BM	Yes	No	Bacteria	Proteobacteria	Alphaproteobacteria	Rhizobiales	Methylobacteriaceae	Methylobacterium			ASV_27	WM2	0.00450741	WM2	WM	No	No	Fungi	Basidiomycota	Tremellomycetes	Tremellales	Bulleraceae	Bullera
	ASV_16	BM3	0.00668599	BM3	BM	Yes	No	Bacteria	Proteobacteria	Alphaproteobacteria	Rhizobiales	Methylobacteriaceae	Methylobacterium			ASV_27	WM3	0.00592977	WM3	WM	No	No	Fungi	Basidiomycota	Tremellomycetes	Tremellales	Bulleraceae	Bullera
	ASV_16	BM4	0.00597325	BM4	BM	Yes	No	Bacteria	Proteobacteria	Alphaproteobacteria	Rhizobiales	Methylobacteriaceae	Methylobacterium			ASV_27	WM4	0.00276169	WM4	WM	No	No	Fungi	Basidiomycota	Tremellomycetes	Tremellales	Bulleraceae	Bullera
	ASV_16	BM5	0.00725057	BM5	BM	Yes	No	Bacteria	Proteobacteria	Alphaproteobacteria	Rhizobiales	Methylobacteriaceae	Methylobacterium			ASV_27	WM5	0.0016555	WM5	WM	No	No	Fungi	Basidiomycota	Tremellomycetes	Tremellales	Bulleraceae	Bullera
	ASV_16	BM6	0.00580593	BM6	BM	Yes	No	Bacteria	Proteobacteria	Alphaproteobacteria	Rhizobiales	Methylobacteriaceae	Methylobacterium			ASV_27	WM6	0.00275587	WM6	WM	No	No	Fungi	Basidiomycota	Tremellomycetes	Tremellales	Bulleraceae	Bullera
	ASV_15	BM1	0.04377	BM1	BM	Yes	No	Bacteria	Proteobacteria	Gammaproteobacteria	Enterobacteriales	Enterobacteriaceae	Pantoea			ASV_7	BG1	0.000368288	BG1	BG	Yes	Yes	Fungi	Ascomycota	Dothideomycetes	Pleosporales	Didymellaceae	Didymella
	ASV_15	BM2	0.0104884	BM2	BM	Yes	No	Bacteria	Proteobacteria	Gammaproteobacteria	Enterobacteriales	Enterobacteriaceae	Pantoea			ASV_7	BG2	0.000384034	BG2	BG	Yes	Yes	Fungi	Ascomycota	Dothideomycetes	Pleosporales	Didymellaceae	Didymella
	ASV_15	BM3	0.0107494	BM3	BM	Yes	No	Bacteria	Proteobacteria	Gammaproteobacteria	Enterobacteriales	Enterobacteriaceae	Pantoea			ASV_7	BG3	0.000131413	BG3	BG	Yes	Yes	Fungi	Ascomycota	Dothideomycetes	Pleosporales	Didymellaceae	Didymella
	ASV_15	BM4	0.00956392	BM4	BM	Yes	No	Bacteria	Proteobacteria	Gammaproteobacteria	Enterobacteriales	Enterobacteriaceae	Pantoea			ASV_7	BG4	0.000311881	BG4	BG	Yes	Yes	Fungi	Ascomycota	Dothideomycetes	Pleosporales	Didymellaceae	Didymella
	ASV_15	BM5	0.00860238	BM5	BM	Yes	No	Bacteria	Proteobacteria	Gammaproteobacteria	Enterobacteriales	Enterobacteriaceae	Pantoea			ASV_7	BG5	0.000327935	BG5	BG	Yes	Yes	Fungi	Ascomycota	Dothideomycetes	Pleosporales	Didymellaceae	Didymella
	ASV_15	BM6	0.00659439	BM6	BM	Yes	No	Bacteria	Proteobacteria	Gammaproteobacteria	Enterobacteriales	Enterobacteriaceae	Pantoea			ASV_7	BG6	0.000299349	BG6	BG	Yes	Yes	Fungi	Ascomycota	Dothideomycetes	Pleosporales	Didymellaceae	Didymella
	ASV_2	BM1	0.319511	BM1	BM	Yes	No	Bacteria	Proteobacteria	Gammaproteobacteria	Pseudomonadales	Pseudomonadaceae	Pseudomonas			ASV_7	BM1	0.00019433	BM1	BM	Yes	No	Fungi	Ascomycota	Dothideomycetes	Pleosporales	Didymellaceae	Didymella
	ASV_2	BM2	0.356152	BM2	BM	Yes	No	Bacteria	Proteobacteria	Gammaproteobacteria	Pseudomonadales	Pseudomonadaceae	Pseudomonas			ASV_7	BM2	0.000603799	BM2	BM	Yes	No	Fungi	Ascomycota	Dothideomycetes	Pleosporales	Didymellaceae	Didymella
	ASV_2	BM3	0.386962	BM3	BM	Yes	No	Bacteria	Proteobacteria	Gammaproteobacteria	Pseudomonadales	Pseudomonadaceae	Pseudomonas			ASV_7	BM3	0.000573709	BM3	BM	Yes	No	Fungi	Ascomycota	Dothideomycetes	Pleosporales	Didymellaceae	Didymella
	ASV_2	BM4	0.344838	BM4	BM	Yes	No	Bacteria	Proteobacteria	Gammaproteobacteria	Pseudomonadales	Pseudomonadaceae	Pseudomonas			ASV_7	BM4	0.000381566	BM4	BM	Yes	No	Fungi	Ascomycota	Dothideomycetes	Pleosporales	Didymellaceae	Didymella
	ASV_2	BM5	0.385246	BM5	BM	Yes	No	Bacteria	Proteobacteria	Gammaproteobacteria	Pseudomonadales	Pseudomonadaceae	Pseudomonas			ASV_7	BM5	0.000522721	BM5	BM	Yes	No	Fungi	Ascomycota	Dothideomycetes	Pleosporales	Didymellaceae	Didymella
	ASV_2	BM6	0.384876	BM6	BM	Yes	No	Bacteria	Proteobacteria	Gammaproteobacteria	Pseudomonadales	Pseudomonadaceae	Pseudomonas			ASV_7	BM6	0.000767423	BM6	BM	Yes	No	Fungi	Ascomycota	Dothideomycetes	Pleosporales	Didymellaceae	Didymella
	ASV_8	BM1	0.163004	BM1	BM	Yes	No	Bacteria	Firmicutes	Bacilli	Bacillales	Staphylococcaceae	Staphylococcus			ASV_7	WG1	0.0350068	WG1	WG	No	Yes	Fungi	Ascomycota	Dothideomycetes	Pleosporales	Didymellaceae	Didymella
	ASV_8	BM2	0.168286	BM2	BM	Yes	No	Bacteria	Firmicutes	Bacilli	Bacillales	Staphylococcaceae	Staphylococcus			ASV_7	WG2	0.0289807	WG2	WG	No	Yes	Fungi	Ascomycota	Dothideomycetes	Pleosporales	Didymellaceae	Didymella
	ASV_8	BM3	0.162811	BM3	BM	Yes	No	Bacteria	Firmicutes	Bacilli	Bacillales	Staphylococcaceae	Staphylococcus			ASV_7	WG3	0.0196411	WG3	WG	No	Yes	Fungi	Ascomycota	Dothideomycetes	Pleosporales	Didymellaceae	Didymella
	ASV_8	BM4	0.176228	BM4	BM	Yes	No	Bacteria	Firmicutes	Bacilli	Bacillales	Staphylococcaceae	Staphylococcus			ASV_7	WG4	0.0177769	WG4	WG	No	Yes	Fungi	Ascomycota	Dothideomycetes	Pleosporales	Didymellaceae	Didymella
	ASV_8	BM5	0.161128	BM5	BM	Yes	No	Bacteria	Firmicutes	Bacilli	Bacillales	Staphylococcaceae	Staphylococcus			ASV_7	WG5	0.019453	WG5	WG	No	Yes	Fungi	Ascomycota	Dothideomycetes	Pleosporales	Didymellaceae	Didymella
	ASV_8	BM6	0.12963	BM6	BM	Yes	No	Bacteria	Firmicutes	Bacilli	Bacillales	Staphylococcaceae	Staphylococcus			ASV_7	WG6	0.0198917	WG6	WG	No	Yes	Fungi	Ascomycota	Dothideomycetes	Pleosporales	Didymellaceae	Didymella
	ASV_12	BM1	0.0130141	BM1	BM	Yes	No	Bacteria	Firmicutes	Bacilli	Lactobacillales	Streptococcaceae	Streptococcus			ASV_7	WM1	0.0978476	WM1	WM	No	No	Fungi	Ascomycota	Dothideomycetes	Pleosporales	Didymellaceae	Didymella
	ASV_12	BM2	0.0173738	BM2	BM	Yes	No	Bacteria	Firmicutes	Bacilli	Lactobacillales	Streptococcaceae	Streptococcus			ASV_7	WM2	0.0952595	WM2	WM	No	No	Fungi	Ascomycota	Dothideomycetes	Pleosporales	Didymellaceae	Didymella
	ASV_12	BM3	0.0177268	BM3	BM	Yes	No	Bacteria	Firmicutes	Bacilli	Lactobacillales	Streptococcaceae	Streptococcus			ASV_7	WM3	0.110461	WM3	WM	No	No	Fungi	Ascomycota	Dothideomycetes	Pleosporales	Didymellaceae	Didymella
	ASV_12	BM4	0.0147653	BM4	BM	Yes	No	Bacteria	Firmicutes	Bacilli	Lactobacillales	Streptococcaceae	Streptococcus			ASV_7	WM4	0.0816249	WM4	WM	No	No	Fungi	Ascomycota	Dothideomycetes	Pleosporales	Didymellaceae	Didymella
	ASV_12	BM5	0.0143783	BM5	BM	Yes	No	Bacteria	Firmicutes	Bacilli	Lactobacillales	Streptococcaceae	Streptococcus			ASV_7	WM5	0.0564526	WM5	WM	No	No	Fungi	Ascomycota	Dothideomycetes	Pleosporales	Didymellaceae	Didymella
	ASV_12	BM6	0.0148732	BM6	BM	Yes	No	Bacteria	Firmicutes	Bacilli	Lactobacillales	Streptococcaceae	Streptococcus			ASV_7	WM6	0.0513026	WM6	WM	No	No	Fungi	Ascomycota	Dothideomycetes	Pleosporales	Didymellaceae	Didymella
	ASV_4	WG1	0.365182	WG1	WG	No	Yes	Bacteria	Proteobacteria	Gammaproteobacteria	Pseudomonadales	Moraxellaceae	Acinetobacter			ASV_8	BG1	0.0105821	BG1	BG	Yes	Yes	Fungi	Ascomycota	Dothideomycetes	Capnodiales	Mycosphaerellaceae	Mycosphaerella
	ASV_4	WG2	0.341116	WG2	WG	No	Yes	Bacteria	Proteobacteria	Gammaproteobacteria	Pseudomonadales	Moraxellaceae	Acinetobacter			ASV_8	BG2	0.0100592	BG2	BG	Yes	Yes	Fungi	Ascomycota	Dothideomycetes	Capnodiales	Mycosphaerellaceae	Mycosphaerella
	ASV_4	WG3	0.280067	WG3	WG	No	Yes	Bacteria	Proteobacteria	Gammaproteobacteria	Pseudomonadales	Moraxellaceae	Acinetobacter			ASV_8	BG3	0.00772708	BG3	BG	Yes	Yes	Fungi	Ascomycota	Dothideomycetes	Capnodiales	Mycosphaerellaceae	Mycosphaerella
	ASV_4	WG4	0.294255	WG4	WG	No	Yes	Bacteria	Proteobacteria	Gammaproteobacteria	Pseudomonadales	Moraxellaceae	Acinetobacter			ASV_8	BG4	0.00800096	BG4	BG	Yes	Yes	Fungi	Ascomycota	Dothideomycetes	Capnodiales	Mycosphaerellaceae	Mycosphaerella
	ASV_4	WG5	0.208297	WG5	WG	No	Yes	Bacteria	Proteobacteria	Gammaproteobacteria	Pseudomonadales	Moraxellaceae	Acinetobacter			ASV_8	BG5	0.0110741	BG5	BG	Yes	Yes	Fungi	Ascomycota	Dothideomycetes	Capnodiales	Mycosphaerellaceae	Mycosphaerella
	ASV_4	WG6	0.32507	WG6	WG	No	Yes	Bacteria	Proteobacteria	Gammaproteobacteria	Pseudomonadales	Moraxellaceae	Acinetobacter			ASV_8	BG6	0.00926734	BG6	BG	Yes	Yes	Fungi	Ascomycota	Dothideomycetes	Capnodiales	Mycosphaerellaceae	Mycosphaerella
	ASV_5	WG1	0.0993503	WG1	WG	No	Yes	Bacteria	Firmicutes	Bacilli	Bacillales	Bacillaceae	Anoxybacillus			ASV_8	BM1	0.00186856	BM1	BM	Yes	No	Fungi	Ascomycota	Dothideomycetes	Capnodiales	Mycosphaerellaceae	Mycosphaerella
	ASV_5	WG2	0.114236	WG2	WG	No	Yes	Bacteria	Firmicutes	Bacilli	Bacillales	Bacillaceae	Anoxybacillus			ASV_8	BM2	0.00207707	BM2	BM	Yes	No	Fungi	Ascomycota	Dothideomycetes	Capnodiales	Mycosphaerellaceae	Mycosphaerella
	ASV_5	WG3	0.0968958	WG3	WG	No	Yes	Bacteria	Firmicutes	Bacilli	Bacillales	Bacillaceae	Anoxybacillus			ASV_8	BM3	0.00235587	BM3	BM	Yes	No	Fungi	Ascomycota	Dothideomycetes	Capnodiales	Mycosphaerellaceae	Mycosphaerella
	ASV_5	WG4	0.106524	WG4	WG	No	Yes	Bacteria	Firmicutes	Bacilli	Bacillales	Bacillaceae	Anoxybacillus			ASV_8	BM4	0.00212246	BM4	BM	Yes	No	Fungi	Ascomycota	Dothideomycetes	Capnodiales	Mycosphaerellaceae	Mycosphaerella
	ASV_5	WG5	0.0890562	WG5	WG	No	Yes	Bacteria	Firmicutes	Bacilli	Bacillales	Bacillaceae	Anoxybacillus			ASV_8	BM5	0.002673	BM5	BM	Yes	No	Fungi	Ascomycota	Dothideomycetes	Capnodiales	Mycosphaerellaceae	Mycosphaerella
	ASV_5	WG6	0.112866	WG6	WG	No	Yes	Bacteria	Firmicutes	Bacilli	Bacillales	Bacillaceae	Anoxybacillus			ASV_8	BM6	0.0027155	BM6	BM	Yes	No	Fungi	Ascomycota	Dothideomycetes	Capnodiales	Mycosphaerellaceae	Mycosphaerella
	ASV_3	WG1	0.24048	WG1	WG	No	Yes	Bacteria	Firmicutes	Bacilli	Bacillales	Bacillaceae	Bacillus			ASV_8	WG1	0.0732037	WG1	WG	No	Yes	Fungi	Ascomycota	Dothideomycetes	Capnodiales	Mycosphaerellaceae	Mycosphaerella
	ASV_3	WG2	0.254107	WG2	WG	No	Yes	Bacteria	Firmicutes	Bacilli	Bacillales	Bacillaceae	Bacillus			ASV_8	WG2	0.0833323	WG2	WG	No	Yes	Fungi	Ascomycota	Dothideomycetes	Capnodiales	Mycosphaerellaceae	Mycosphaerella
	ASV_3	WG3	0.277189	WG3	WG	No	Yes	Bacteria	Firmicutes	Bacilli	Bacillales	Bacillaceae	Bacillus			ASV_8	WG3	0.0807373	WG3	WG	No	Yes	Fungi	Ascomycota	Dothideomycetes	Capnodiales	Mycosphaerellaceae	Mycosphaerella
	ASV_3	WG4	0.259094	WG4	WG	No	Yes	Bacteria	Firmicutes	Bacilli	Bacillales	Bacillaceae	Bacillus			ASV_8	WG4	0.0757294	WG4	WG	No	Yes	Fungi	Ascomycota	Dothideomycetes	Capnodiales	Mycosphaerellaceae	Mycosphaerella
	ASV_3	WG5	0.230213	WG5	WG	No	Yes	Bacteria	Firmicutes	Bacilli	Bacillales	Bacillaceae	Bacillus			ASV_8	WG5	0.0984779	WG5	WG	No	Yes	Fungi	Ascomycota	Dothideomycetes	Capnodiales	Mycosphaerellaceae	Mycosphaerella
	ASV_3	WG6	0.23775	WG6	WG	No	Yes	Bacteria	Firmicutes	Bacilli	Bacillales	Bacillaceae	Bacillus			ASV_8	WG6	0.0738937	WG6	WG	No	Yes	Fungi	Ascomycota	Dothideomycetes	Capnodiales	Mycosphaerellaceae	Mycosphaerella
	ASV_7	WG1	0.0638215	WG1	WG	No	Yes	Bacteria	Firmicutes	Clostridia	Clostridiales	Clostridiaceae_1	Clostridium_sensu_stricto_18			ASV_8	WM1	0.0567686	WM1	WM	No	No	Fungi	Ascomycota	Dothideomycetes	Capnodiales	Mycosphaerellaceae	Mycosphaerella
	ASV_7	WG2	0.0541148	WG2	WG	No	Yes	Bacteria	Firmicutes	Clostridia	Clostridiales	Clostridiaceae_1	Clostridium_sensu_stricto_18			ASV_8	WM2	0.0610677	WM2	WM	No	No	Fungi	Ascomycota	Dothideomycetes	Capnodiales	Mycosphaerellaceae	Mycosphaerella
	ASV_7	WG3	0.0674937	WG3	WG	No	Yes	Bacteria	Firmicutes	Clostridia	Clostridiales	Clostridiaceae_1	Clostridium_sensu_stricto_18			ASV_8	WM3	0.0593871	WM3	WM	No	No	Fungi	Ascomycota	Dothideomycetes	Capnodiales	Mycosphaerellaceae	Mycosphaerella
	ASV_7	WG4	0.0608238	WG4	WG	No	Yes	Bacteria	Firmicutes	Clostridia	Clostridiales	Clostridiaceae_1	Clostridium_sensu_stricto_18			ASV_8	WM4	0.0510772	WM4	WM	No	No	Fungi	Ascomycota	Dothideomycetes	Capnodiales	Mycosphaerellaceae	Mycosphaerella
	ASV_7	WG5	0.0571434	WG5	WG	No	Yes	Bacteria	Firmicutes	Clostridia	Clostridiales	Clostridiaceae_1	Clostridium_sensu_stricto_18			ASV_8	WM5	0.122354	WM5	WM	No	No	Fungi	Ascomycota	Dothideomycetes	Capnodiales	Mycosphaerellaceae	Mycosphaerella
	ASV_7	WG6	0.0639176	WG6	WG	No	Yes	Bacteria	Firmicutes	Clostridia	Clostridiales	Clostridiaceae_1	Clostridium_sensu_stricto_18			ASV_8	WM6	0.151396	WM6	WM	No	No	Fungi	Ascomycota	Dothideomycetes	Capnodiales	Mycosphaerellaceae	Mycosphaerella
	ASV_11	WG1	0.027747	WG1	WG	No	Yes	Bacteria	Proteobacteria	Gammaproteobacteria	Enterobacteriales	Enterobacteriaceae	Klebsiella			ASV_40	BG1	0	BG1	BG	Yes	Yes	Fungi	Ascomycota	Eurotiomycetes	Eurotiales	Aspergillaceae	Penicillium
	ASV_11	WG2	0.0324768	WG2	WG	No	Yes	Bacteria	Proteobacteria	Gammaproteobacteria	Enterobacteriales	Enterobacteriaceae	Klebsiella			ASV_40	BG2	0	BG2	BG	Yes	Yes	Fungi	Ascomycota	Eurotiomycetes	Eurotiales	Aspergillaceae	Penicillium
	ASV_11	WG3	0.0234998	WG3	WG	No	Yes	Bacteria	Proteobacteria	Gammaproteobacteria	Enterobacteriales	Enterobacteriaceae	Klebsiella			ASV_40	BG3	0	BG3	BG	Yes	Yes	Fungi	Ascomycota	Eurotiomycetes	Eurotiales	Aspergillaceae	Penicillium
	ASV_11	WG4	0.0269921	WG4	WG	No	Yes	Bacteria	Proteobacteria	Gammaproteobacteria	Enterobacteriales	Enterobacteriaceae	Klebsiella			ASV_40	BG4	1.19954e-05	BG4	BG	Yes	Yes	Fungi	Ascomycota	Eurotiomycetes	Eurotiales	Aspergillaceae	Penicillium
	ASV_11	WG5	0.0375196	WG5	WG	No	Yes	Bacteria	Proteobacteria	Gammaproteobacteria	Enterobacteriales	Enterobacteriaceae	Klebsiella			ASV_40	BG5	0	BG5	BG	Yes	Yes	Fungi	Ascomycota	Eurotiomycetes	Eurotiales	Aspergillaceae	Penicillium
	ASV_11	WG6	0.0233674	WG6	WG	No	Yes	Bacteria	Proteobacteria	Gammaproteobacteria	Enterobacteriales	Enterobacteriaceae	Klebsiella			ASV_40	BG6	2.49457e-05	BG6	BG	Yes	Yes	Fungi	Ascomycota	Eurotiomycetes	Eurotiales	Aspergillaceae	Penicillium
	ASV_16	WG1	0.00352119	WG1	WG	No	Yes	Bacteria	Proteobacteria	Alphaproteobacteria	Rhizobiales	Methylobacteriaceae	Methylobacterium			ASV_40	BM1	0	BM1	BM	Yes	No	Fungi	Ascomycota	Eurotiomycetes	Eurotiales	Aspergillaceae	Penicillium
	ASV_16	WG2	0.00525039	WG2	WG	No	Yes	Bacteria	Proteobacteria	Alphaproteobacteria	Rhizobiales	Methylobacteriaceae	Methylobacterium			ASV_40	BM2	1.2076e-05	BM2	BM	Yes	No	Fungi	Ascomycota	Eurotiomycetes	Eurotiales	Aspergillaceae	Penicillium
	ASV_16	WG3	0.00475462	WG3	WG	No	Yes	Bacteria	Proteobacteria	Alphaproteobacteria	Rhizobiales	Methylobacteriaceae	Methylobacterium			ASV_40	BM3	1.22066e-05	BM3	BM	Yes	No	Fungi	Ascomycota	Eurotiomycetes	Eurotiales	Aspergillaceae	Penicillium
	ASV_16	WG4	0.00639642	WG4	WG	No	Yes	Bacteria	Proteobacteria	Alphaproteobacteria	Rhizobiales	Methylobacteriaceae	Methylobacterium			ASV_40	BM4	0	BM4	BM	Yes	No	Fungi	Ascomycota	Eurotiomycetes	Eurotiales	Aspergillaceae	Penicillium
	ASV_16	WG5	0.00872754	WG5	WG	No	Yes	Bacteria	Proteobacteria	Alphaproteobacteria	Rhizobiales	Methylobacteriaceae	Methylobacterium			ASV_40	BM5	0	BM5	BM	Yes	No	Fungi	Ascomycota	Eurotiomycetes	Eurotiales	Aspergillaceae	Penicillium
	ASV_16	WG6	0.00911854	WG6	WG	No	Yes	Bacteria	Proteobacteria	Alphaproteobacteria	Rhizobiales	Methylobacteriaceae	Methylobacterium			ASV_40	BM6	0	BM6	BM	Yes	No	Fungi	Ascomycota	Eurotiomycetes	Eurotiales	Aspergillaceae	Penicillium
	ASV_15	WG1	0.0129756	WG1	WG	No	Yes	Bacteria	Proteobacteria	Gammaproteobacteria	Enterobacteriales	Enterobacteriaceae	Pantoea			ASV_40	WG1	0.00140027	WG1	WG	No	Yes	Fungi	Ascomycota	Eurotiomycetes	Eurotiales	Aspergillaceae	Penicillium
	ASV_15	WG2	0.0131856	WG2	WG	No	Yes	Bacteria	Proteobacteria	Gammaproteobacteria	Enterobacteriales	Enterobacteriaceae	Pantoea			ASV_40	WG2	0.00257663	WG2	WG	No	Yes	Fungi	Ascomycota	Eurotiomycetes	Eurotiales	Aspergillaceae	Penicillium
	ASV_15	WG3	0.0126425	WG3	WG	No	Yes	Bacteria	Proteobacteria	Gammaproteobacteria	Enterobacteriales	Enterobacteriaceae	Pantoea			ASV_40	WG3	0.00241699	WG3	WG	No	Yes	Fungi	Ascomycota	Eurotiomycetes	Eurotiales	Aspergillaceae	Penicillium
	ASV_15	WG4	0.0210388	WG4	WG	No	Yes	Bacteria	Proteobacteria	Gammaproteobacteria	Enterobacteriales	Enterobacteriaceae	Pantoea			ASV_40	WG4	0.00225923	WG4	WG	No	Yes	Fungi	Ascomycota	Eurotiomycetes	Eurotiales	Aspergillaceae	Penicillium
	ASV_15	WG5	0.0891443	WG5	WG	No	Yes	Bacteria	Proteobacteria	Gammaproteobacteria	Enterobacteriales	Enterobacteriaceae	Pantoea			ASV_40	WG5	0.00180635	WG5	WG	No	Yes	Fungi	Ascomycota	Eurotiomycetes	Eurotiales	Aspergillaceae	Penicillium
	ASV_15	WG6	0.0168491	WG6	WG	No	Yes	Bacteria	Proteobacteria	Gammaproteobacteria	Enterobacteriales	Enterobacteriaceae	Pantoea			ASV_40	WG6	0.00245907	WG6	WG	No	Yes	Fungi	Ascomycota	Eurotiomycetes	Eurotiales	Aspergillaceae	Penicillium
	ASV_2	WG1	0.0101938	WG1	WG	No	Yes	Bacteria	Proteobacteria	Gammaproteobacteria	Pseudomonadales	Pseudomonadaceae	Pseudomonas			ASV_40	WM1	0	WM1	WM	No	No	Fungi	Ascomycota	Eurotiomycetes	Eurotiales	Aspergillaceae	Penicillium
	ASV_2	WG2	0.0130066	WG2	WG	No	Yes	Bacteria	Proteobacteria	Gammaproteobacteria	Pseudomonadales	Pseudomonadaceae	Pseudomonas			ASV_40	WM2	1.40418e-05	WM2	WM	No	No	Fungi	Ascomycota	Eurotiomycetes	Eurotiales	Aspergillaceae	Penicillium
	ASV_2	WG3	0.0176886	WG3	WG	No	Yes	Bacteria	Proteobacteria	Gammaproteobacteria	Pseudomonadales	Pseudomonadaceae	Pseudomonas			ASV_40	WM3	0	WM3	WM	No	No	Fungi	Ascomycota	Eurotiomycetes	Eurotiales	Aspergillaceae	Penicillium
	ASV_2	WG4	0.0194012	WG4	WG	No	Yes	Bacteria	Proteobacteria	Gammaproteobacteria	Pseudomonadales	Pseudomonadaceae	Pseudomonas			ASV_40	WM4	0	WM4	WM	No	No	Fungi	Ascomycota	Eurotiomycetes	Eurotiales	Aspergillaceae	Penicillium
	ASV_2	WG5	0.021669	WG5	WG	No	Yes	Bacteria	Proteobacteria	Gammaproteobacteria	Pseudomonadales	Pseudomonadaceae	Pseudomonas			ASV_40	WM5	0	WM5	WM	No	No	Fungi	Ascomycota	Eurotiomycetes	Eurotiales	Aspergillaceae	Penicillium
	ASV_2	WG6	0.0151273	WG6	WG	No	Yes	Bacteria	Proteobacteria	Gammaproteobacteria	Pseudomonadales	Pseudomonadaceae	Pseudomonas			ASV_40	WM6	1.35757e-05	WM6	WM	No	No	Fungi	Ascomycota	Eurotiomycetes	Eurotiales	Aspergillaceae	Penicillium
	ASV_8	WG1	0.00202468	WG1	WG	No	Yes	Bacteria	Firmicutes	Bacilli	Bacillales	Staphylococcaceae	Staphylococcus			ASV_26	BG1	1.22763e-05	BG1	BG	Yes	Yes	Fungi	Basidiomycota	Microbotryomycetes	Sporidiobolales	Sporidiobolaceae	Rhodotorula
	ASV_8	WG2	0.000676186	WG2	WG	No	Yes	Bacteria	Firmicutes	Bacilli	Bacillales	Staphylococcaceae	Staphylococcus			ASV_26	BG2	4.95528e-05	BG2	BG	Yes	Yes	Fungi	Basidiomycota	Microbotryomycetes	Sporidiobolales	Sporidiobolaceae	Rhodotorula
	ASV_8	WG3	0.00189456	WG3	WG	No	Yes	Bacteria	Firmicutes	Bacilli	Bacillales	Staphylococcaceae	Staphylococcus			ASV_26	BG3	0	BG3	BG	Yes	Yes	Fungi	Basidiomycota	Microbotryomycetes	Sporidiobolales	Sporidiobolaceae	Rhodotorula
	ASV_8	WG4	0.00344867	WG4	WG	No	Yes	Bacteria	Firmicutes	Bacilli	Bacillales	Staphylococcaceae	Staphylococcus			ASV_26	BG4	1.19954e-05	BG4	BG	Yes	Yes	Fungi	Basidiomycota	Microbotryomycetes	Sporidiobolales	Sporidiobolaceae	Rhodotorula
	ASV_8	WG5	0.000987358	WG5	WG	No	Yes	Bacteria	Firmicutes	Bacilli	Bacillales	Staphylococcaceae	Staphylococcus			ASV_26	BG5	3.78387e-05	BG5	BG	Yes	Yes	Fungi	Basidiomycota	Microbotryomycetes	Sporidiobolales	Sporidiobolaceae	Rhodotorula
	ASV_8	WG6	0.00346118	WG6	WG	No	Yes	Bacteria	Firmicutes	Bacilli	Bacillales	Staphylococcaceae	Staphylococcus			ASV_26	BG6	7.48372e-05	BG6	BG	Yes	Yes	Fungi	Basidiomycota	Microbotryomycetes	Sporidiobolales	Sporidiobolaceae	Rhodotorula
	ASV_12	WG1	0.0204581	WG1	WG	No	Yes	Bacteria	Firmicutes	Bacilli	Lactobacillales	Streptococcaceae	Streptococcus			ASV_26	BM1	0	BM1	BM	Yes	No	Fungi	Basidiomycota	Microbotryomycetes	Sporidiobolales	Sporidiobolaceae	Rhodotorula
	ASV_12	WG2	0.0213993	WG2	WG	No	Yes	Bacteria	Firmicutes	Bacilli	Lactobacillales	Streptococcaceae	Streptococcus			ASV_26	BM2	1.2076e-05	BM2	BM	Yes	No	Fungi	Basidiomycota	Microbotryomycetes	Sporidiobolales	Sporidiobolaceae	Rhodotorula
	ASV_12	WG3	0.0302219	WG3	WG	No	Yes	Bacteria	Firmicutes	Bacilli	Lactobacillales	Streptococcaceae	Streptococcus			ASV_26	BM3	0	BM3	BM	Yes	No	Fungi	Basidiomycota	Microbotryomycetes	Sporidiobolales	Sporidiobolaceae	Rhodotorula
	ASV_12	WG4	0.0229077	WG4	WG	No	Yes	Bacteria	Firmicutes	Bacilli	Lactobacillales	Streptococcaceae	Streptococcus			ASV_26	BM4	0	BM4	BM	Yes	No	Fungi	Basidiomycota	Microbotryomycetes	Sporidiobolales	Sporidiobolaceae	Rhodotorula
	ASV_12	WG5	0.0186188	WG5	WG	No	Yes	Bacteria	Firmicutes	Bacilli	Lactobacillales	Streptococcaceae	Streptococcus			ASV_26	BM5	0	BM5	BM	Yes	No	Fungi	Basidiomycota	Microbotryomycetes	Sporidiobolales	Sporidiobolaceae	Rhodotorula
	ASV_12	WG6	0.020117	WG6	WG	No	Yes	Bacteria	Firmicutes	Bacilli	Lactobacillales	Streptococcaceae	Streptococcus			ASV_26	BM6	0	BM6	BM	Yes	No	Fungi	Basidiomycota	Microbotryomycetes	Sporidiobolales	Sporidiobolaceae	Rhodotorula
	ASV_4	WM1	0.0670071	WM1	WM	No	No	Bacteria	Proteobacteria	Gammaproteobacteria	Pseudomonadales	Moraxellaceae	Acinetobacter			ASV_26	WG1	0.01354	WG1	WG	No	Yes	Fungi	Basidiomycota	Microbotryomycetes	Sporidiobolales	Sporidiobolaceae	Rhodotorula
	ASV_4	WM2	0.0661534	WM2	WM	No	No	Bacteria	Proteobacteria	Gammaproteobacteria	Pseudomonadales	Moraxellaceae	Acinetobacter			ASV_26	WG2	0.0164802	WG2	WG	No	Yes	Fungi	Basidiomycota	Microbotryomycetes	Sporidiobolales	Sporidiobolaceae	Rhodotorula
	ASV_4	WM3	0.0725907	WM3	WM	No	No	Bacteria	Proteobacteria	Gammaproteobacteria	Pseudomonadales	Moraxellaceae	Acinetobacter			ASV_26	WG3	0.00758057	WG3	WG	No	Yes	Fungi	Basidiomycota	Microbotryomycetes	Sporidiobolales	Sporidiobolaceae	Rhodotorula
	ASV_4	WM4	0.0708299	WM4	WM	No	No	Bacteria	Proteobacteria	Gammaproteobacteria	Pseudomonadales	Moraxellaceae	Acinetobacter			ASV_26	WG4	0.0151046	WG4	WG	No	Yes	Fungi	Basidiomycota	Microbotryomycetes	Sporidiobolales	Sporidiobolaceae	Rhodotorula
	ASV_4	WM5	0.0662851	WM5	WM	No	No	Bacteria	Proteobacteria	Gammaproteobacteria	Pseudomonadales	Moraxellaceae	Acinetobacter			ASV_26	WG5	0.0138319	WG5	WG	No	Yes	Fungi	Basidiomycota	Microbotryomycetes	Sporidiobolales	Sporidiobolaceae	Rhodotorula
	ASV_4	WM6	0.0661477	WM6	WM	No	No	Bacteria	Proteobacteria	Gammaproteobacteria	Pseudomonadales	Moraxellaceae	Acinetobacter			ASV_26	WG6	0.0154361	WG6	WG	No	Yes	Fungi	Basidiomycota	Microbotryomycetes	Sporidiobolales	Sporidiobolaceae	Rhodotorula
	ASV_5	WM1	0.110665	WM1	WM	No	No	Bacteria	Firmicutes	Bacilli	Bacillales	Bacillaceae	Anoxybacillus			ASV_26	WM1	0	WM1	WM	No	No	Fungi	Basidiomycota	Microbotryomycetes	Sporidiobolales	Sporidiobolaceae	Rhodotorula
	ASV_5	WM2	0.110823	WM2	WM	No	No	Bacteria	Firmicutes	Bacilli	Bacillales	Bacillaceae	Anoxybacillus			ASV_26	WM2	0	WM2	WM	No	No	Fungi	Basidiomycota	Microbotryomycetes	Sporidiobolales	Sporidiobolaceae	Rhodotorula
	ASV_5	WM3	0.0982124	WM3	WM	No	No	Bacteria	Firmicutes	Bacilli	Bacillales	Bacillaceae	Anoxybacillus			ASV_26	WM3	0	WM3	WM	No	No	Fungi	Basidiomycota	Microbotryomycetes	Sporidiobolales	Sporidiobolaceae	Rhodotorula
	ASV_5	WM4	0.107243	WM4	WM	No	No	Bacteria	Firmicutes	Bacilli	Bacillales	Bacillaceae	Anoxybacillus			ASV_26	WM4	0	WM4	WM	No	No	Fungi	Basidiomycota	Microbotryomycetes	Sporidiobolales	Sporidiobolaceae	Rhodotorula
	ASV_5	WM5	0.111241	WM5	WM	No	No	Bacteria	Firmicutes	Bacilli	Bacillales	Bacillaceae	Anoxybacillus			ASV_26	WM5	1.27346e-05	WM5	WM	No	No	Fungi	Basidiomycota	Microbotryomycetes	Sporidiobolales	Sporidiobolaceae	Rhodotorula
	ASV_5	WM6	0.105929	WM6	WM	No	No	Bacteria	Firmicutes	Bacilli	Bacillales	Bacillaceae	Anoxybacillus			ASV_26	WM6	0	WM6	WM	No	No	Fungi	Basidiomycota	Microbotryomycetes	Sporidiobolales	Sporidiobolaceae	Rhodotorula
	ASV_3	WM1	0.399857	WM1	WM	No	No	Bacteria	Firmicutes	Bacilli	Bacillales	Bacillaceae	Bacillus			ASV_29	BG1	0.0112573	BG1	BG	Yes	Yes	Fungi	Basidiomycota	Agaricomycetes	Agaricales	Schizophyllaceae	Schizophyllum
	ASV_3	WM2	0.416525	WM2	WM	No	No	Bacteria	Firmicutes	Bacilli	Bacillales	Bacillaceae	Bacillus			ASV_29	BG2	0.0104556	BG2	BG	Yes	Yes	Fungi	Basidiomycota	Agaricomycetes	Agaricales	Schizophyllaceae	Schizophyllum
	ASV_3	WM3	0.418825	WM3	WM	No	No	Bacteria	Firmicutes	Bacilli	Bacillales	Bacillaceae	Bacillus			ASV_29	BG3	0.00678091	BG3	BG	Yes	Yes	Fungi	Basidiomycota	Agaricomycetes	Agaricales	Schizophyllaceae	Schizophyllum
	ASV_3	WM4	0.400141	WM4	WM	No	No	Bacteria	Firmicutes	Bacilli	Bacillales	Bacillaceae	Bacillus			ASV_29	BG4	0.00788101	BG4	BG	Yes	Yes	Fungi	Basidiomycota	Agaricomycetes	Agaricales	Schizophyllaceae	Schizophyllum
	ASV_3	WM5	0.426509	WM5	WM	No	No	Bacteria	Firmicutes	Bacilli	Bacillales	Bacillaceae	Bacillus			ASV_29	BG5	0.0126003	BG5	BG	Yes	Yes	Fungi	Basidiomycota	Agaricomycetes	Agaricales	Schizophyllaceae	Schizophyllum
	ASV_3	WM6	0.370409	WM6	WM	No	No	Bacteria	Firmicutes	Bacilli	Bacillales	Bacillaceae	Bacillus			ASV_29	BG6	0.0106768	BG6	BG	Yes	Yes	Fungi	Basidiomycota	Agaricomycetes	Agaricales	Schizophyllaceae	Schizophyllum
	ASV_7	WM1	0.073227	WM1	WM	No	No	Bacteria	Firmicutes	Clostridia	Clostridiales	Clostridiaceae_1	Clostridium_sensu_stricto_18			ASV_29	BM1	0	BM1	BM	Yes	No	Fungi	Basidiomycota	Agaricomycetes	Agaricales	Schizophyllaceae	Schizophyllum
	ASV_7	WM2	0.0657282	WM2	WM	No	No	Bacteria	Firmicutes	Clostridia	Clostridiales	Clostridiaceae_1	Clostridium_sensu_stricto_18			ASV_29	BM2	0	BM2	BM	Yes	No	Fungi	Basidiomycota	Agaricomycetes	Agaricales	Schizophyllaceae	Schizophyllum
	ASV_7	WM3	0.0746216	WM3	WM	No	No	Bacteria	Firmicutes	Clostridia	Clostridiales	Clostridiaceae_1	Clostridium_sensu_stricto_18			ASV_29	BM3	3.66198e-05	BM3	BM	Yes	No	Fungi	Basidiomycota	Agaricomycetes	Agaricales	Schizophyllaceae	Schizophyllum
	ASV_7	WM4	0.0650546	WM4	WM	No	No	Bacteria	Firmicutes	Clostridia	Clostridiales	Clostridiaceae_1	Clostridium_sensu_stricto_18			ASV_29	BM4	1.19239e-05	BM4	BM	Yes	No	Fungi	Basidiomycota	Agaricomycetes	Agaricales	Schizophyllaceae	Schizophyllum
	ASV_7	WM5	0.0585856	WM5	WM	No	No	Bacteria	Firmicutes	Clostridia	Clostridiales	Clostridiaceae_1	Clostridium_sensu_stricto_18			ASV_29	BM5	0	BM5	BM	Yes	No	Fungi	Basidiomycota	Agaricomycetes	Agaricales	Schizophyllaceae	Schizophyllum
	ASV_7	WM6	0.0640146	WM6	WM	No	No	Bacteria	Firmicutes	Clostridia	Clostridiales	Clostridiaceae_1	Clostridium_sensu_stricto_18			ASV_29	BM6	1.18065e-05	BM6	BM	Yes	No	Fungi	Basidiomycota	Agaricomycetes	Agaricales	Schizophyllaceae	Schizophyllum
	ASV_11	WM1	0.0232895	WM1	WM	No	No	Bacteria	Proteobacteria	Gammaproteobacteria	Enterobacteriales	Enterobacteriaceae	Klebsiella			ASV_29	WG1	2.43525e-05	WG1	WG	No	Yes	Fungi	Basidiomycota	Agaricomycetes	Agaricales	Schizophyllaceae	Schizophyllum
	ASV_11	WM2	0.0237893	WM2	WM	No	No	Bacteria	Proteobacteria	Gammaproteobacteria	Enterobacteriales	Enterobacteriaceae	Klebsiella			ASV_29	WG2	0.000267867	WG2	WG	No	Yes	Fungi	Basidiomycota	Agaricomycetes	Agaricales	Schizophyllaceae	Schizophyllum
	ASV_11	WM3	0.0234964	WM3	WM	No	No	Bacteria	Proteobacteria	Gammaproteobacteria	Enterobacteriales	Enterobacteriaceae	Klebsiella			ASV_29	WG3	3.66211e-05	WG3	WG	No	Yes	Fungi	Basidiomycota	Agaricomycetes	Agaricales	Schizophyllaceae	Schizophyllum
	ASV_11	WM4	0.0240873	WM4	WM	No	No	Bacteria	Proteobacteria	Gammaproteobacteria	Enterobacteriales	Enterobacteriaceae	Klebsiella			ASV_29	WG4	3.87297e-05	WG4	WG	No	Yes	Fungi	Basidiomycota	Agaricomycetes	Agaricales	Schizophyllaceae	Schizophyllum
	ASV_11	WM5	0.0313039	WM5	WM	No	No	Bacteria	Proteobacteria	Gammaproteobacteria	Enterobacteriales	Enterobacteriaceae	Klebsiella			ASV_29	WG5	3.78955e-05	WG5	WG	No	Yes	Fungi	Basidiomycota	Agaricomycetes	Agaricales	Schizophyllaceae	Schizophyllum
	ASV_11	WM6	0.0275322	WM6	WM	No	No	Bacteria	Proteobacteria	Gammaproteobacteria	Enterobacteriales	Enterobacteriaceae	Klebsiella			ASV_29	WG6	1.21736e-05	WG6	WG	No	Yes	Fungi	Basidiomycota	Agaricomycetes	Agaricales	Schizophyllaceae	Schizophyllum
	ASV_16	WM1	0.045208	WM1	WM	No	No	Bacteria	Proteobacteria	Alphaproteobacteria	Rhizobiales	Methylobacteriaceae	Methylobacterium			ASV_29	WM1	0	WM1	WM	No	No	Fungi	Basidiomycota	Agaricomycetes	Agaricales	Schizophyllaceae	Schizophyllum
	ASV_16	WM2	0.0488989	WM2	WM	No	No	Bacteria	Proteobacteria	Alphaproteobacteria	Rhizobiales	Methylobacteriaceae	Methylobacterium			ASV_29	WM2	5.61672e-05	WM2	WM	No	No	Fungi	Basidiomycota	Agaricomycetes	Agaricales	Schizophyllaceae	Schizophyllum
	ASV_16	WM3	0.0456703	WM3	WM	No	No	Bacteria	Proteobacteria	Alphaproteobacteria	Rhizobiales	Methylobacteriaceae	Methylobacterium			ASV_29	WM3	0	WM3	WM	No	No	Fungi	Basidiomycota	Agaricomycetes	Agaricales	Schizophyllaceae	Schizophyllum
	ASV_16	WM4	0.0480573	WM4	WM	No	No	Bacteria	Proteobacteria	Alphaproteobacteria	Rhizobiales	Methylobacteriaceae	Methylobacterium			ASV_29	WM4	0	WM4	WM	No	No	Fungi	Basidiomycota	Agaricomycetes	Agaricales	Schizophyllaceae	Schizophyllum
	ASV_16	WM5	0.0501735	WM5	WM	No	No	Bacteria	Proteobacteria	Alphaproteobacteria	Rhizobiales	Methylobacteriaceae	Methylobacterium			ASV_29	WM5	7.64078e-05	WM5	WM	No	No	Fungi	Basidiomycota	Agaricomycetes	Agaricales	Schizophyllaceae	Schizophyllum
	ASV_16	WM6	0.0589128	WM6	WM	No	No	Bacteria	Proteobacteria	Alphaproteobacteria	Rhizobiales	Methylobacteriaceae	Methylobacterium			ASV_29	WM6	2.71514e-05	WM6	WM	No	No	Fungi	Basidiomycota	Agaricomycetes	Agaricales	Schizophyllaceae	Schizophyllum
	ASV_15	WM1	0.0159172	WM1	WM	No	No	Bacteria	Proteobacteria	Gammaproteobacteria	Enterobacteriales	Enterobacteriaceae	Pantoea			ASV_10	BG1	0.00494733	BG1	BG	Yes	Yes	Fungi	Basidiomycota	Tremellomycetes	Tremellales	Bulleribasidiaceae	Vishniacozyma
	ASV_15	WM2	0.0128458	WM2	WM	No	No	Bacteria	Proteobacteria	Gammaproteobacteria	Enterobacteriales	Enterobacteriaceae	Pantoea			ASV_10	BG2	0.00541364	BG2	BG	Yes	Yes	Fungi	Basidiomycota	Tremellomycetes	Tremellales	Bulleribasidiaceae	Vishniacozyma
	ASV_15	WM3	0.0145229	WM3	WM	No	No	Bacteria	Proteobacteria	Gammaproteobacteria	Enterobacteriales	Enterobacteriaceae	Pantoea			ASV_10	BG3	0.0070963	BG3	BG	Yes	Yes	Fungi	Basidiomycota	Tremellomycetes	Tremellales	Bulleribasidiaceae	Vishniacozyma
	ASV_15	WM4	0.0170443	WM4	WM	No	No	Bacteria	Proteobacteria	Gammaproteobacteria	Enterobacteriales	Enterobacteriaceae	Pantoea			ASV_10	BG4	0.00459425	BG4	BG	Yes	Yes	Fungi	Basidiomycota	Tremellomycetes	Tremellales	Bulleribasidiaceae	Vishniacozyma
	ASV_15	WM5	0.0257648	WM5	WM	No	No	Bacteria	Proteobacteria	Gammaproteobacteria	Enterobacteriales	Enterobacteriaceae	Pantoea			ASV_10	BG5	0.00472983	BG5	BG	Yes	Yes	Fungi	Basidiomycota	Tremellomycetes	Tremellales	Bulleribasidiaceae	Vishniacozyma
	ASV_15	WM6	0.0212209	WM6	WM	No	No	Bacteria	Proteobacteria	Gammaproteobacteria	Enterobacteriales	Enterobacteriaceae	Pantoea			ASV_10	BG6	0.00460249	BG6	BG	Yes	Yes	Fungi	Basidiomycota	Tremellomycetes	Tremellales	Bulleribasidiaceae	Vishniacozyma
	ASV_2	WM1	0.0166922	WM1	WM	No	No	Bacteria	Proteobacteria	Gammaproteobacteria	Pseudomonadales	Pseudomonadaceae	Pseudomonas			ASV_10	BM1	0.00259356	BM1	BM	Yes	No	Fungi	Basidiomycota	Tremellomycetes	Tremellales	Bulleribasidiaceae	Vishniacozyma
	ASV_2	WM2	0.0177245	WM2	WM	No	No	Bacteria	Proteobacteria	Gammaproteobacteria	Pseudomonadales	Pseudomonadaceae	Pseudomonas			ASV_10	BM2	0.00210122	BM2	BM	Yes	No	Fungi	Basidiomycota	Tremellomycetes	Tremellales	Bulleribasidiaceae	Vishniacozyma
	ASV_2	WM3	0.0157036	WM3	WM	No	No	Bacteria	Proteobacteria	Gammaproteobacteria	Pseudomonadales	Pseudomonadaceae	Pseudomonas			ASV_10	BM3	0.00218498	BM3	BM	Yes	No	Fungi	Basidiomycota	Tremellomycetes	Tremellales	Bulleribasidiaceae	Vishniacozyma
	ASV_2	WM4	0.0133114	WM4	WM	No	No	Bacteria	Proteobacteria	Gammaproteobacteria	Pseudomonadales	Pseudomonadaceae	Pseudomonas			ASV_10	BM4	0.00214631	BM4	BM	Yes	No	Fungi	Basidiomycota	Tremellomycetes	Tremellales	Bulleribasidiaceae	Vishniacozyma
	ASV_2	WM5	0.0176515	WM5	WM	No	No	Bacteria	Proteobacteria	Gammaproteobacteria	Pseudomonadales	Pseudomonadaceae	Pseudomonas			ASV_10	BM5	0.00242352	BM5	BM	Yes	No	Fungi	Basidiomycota	Tremellomycetes	Tremellales	Bulleribasidiaceae	Vishniacozyma
	ASV_2	WM6	0.0194617	WM6	WM	No	No	Bacteria	Proteobacteria	Gammaproteobacteria	Pseudomonadales	Pseudomonadaceae	Pseudomonas			ASV_10	BM6	0.00262105	BM6	BM	Yes	No	Fungi	Basidiomycota	Tremellomycetes	Tremellales	Bulleribasidiaceae	Vishniacozyma
	ASV_8	WM1	0.00443137	WM1	WM	No	No	Bacteria	Firmicutes	Bacilli	Bacillales	Staphylococcaceae	Staphylococcus			ASV_10	WG1	0.0806677	WG1	WG	No	Yes	Fungi	Basidiomycota	Tremellomycetes	Tremellales	Bulleribasidiaceae	Vishniacozyma
	ASV_8	WM2	0.00384925	WM2	WM	No	No	Bacteria	Firmicutes	Bacilli	Bacillales	Staphylococcaceae	Staphylococcus			ASV_10	WG2	0.0442109	WG2	WG	No	Yes	Fungi	Basidiomycota	Tremellomycetes	Tremellales	Bulleribasidiaceae	Vishniacozyma
	ASV_8	WM3	0.00285735	WM3	WM	No	No	Bacteria	Firmicutes	Bacilli	Bacillales	Staphylococcaceae	Staphylococcus			ASV_10	WG3	0.0494263	WG3	WG	No	Yes	Fungi	Basidiomycota	Tremellomycetes	Tremellales	Bulleribasidiaceae	Vishniacozyma
	ASV_8	WM4	0.00248855	WM4	WM	No	No	Bacteria	Firmicutes	Bacilli	Bacillales	Staphylococcaceae	Staphylococcus			ASV_10	WG4	0.0552285	WG4	WG	No	Yes	Fungi	Basidiomycota	Tremellomycetes	Tremellales	Bulleribasidiaceae	Vishniacozyma
	ASV_8	WM5	0.00448183	WM5	WM	No	No	Bacteria	Firmicutes	Bacilli	Bacillales	Staphylococcaceae	Staphylococcus			ASV_10	WG5	0.0601528	WG5	WG	No	Yes	Fungi	Basidiomycota	Tremellomycetes	Tremellales	Bulleribasidiaceae	Vishniacozyma
	ASV_8	WM6	0.0039803	WM6	WM	No	No	Bacteria	Firmicutes	Bacilli	Bacillales	Staphylococcaceae	Staphylococcus			ASV_10	WG6	0.0465153	WG6	WG	No	Yes	Fungi	Basidiomycota	Tremellomycetes	Tremellales	Bulleribasidiaceae	Vishniacozyma
	ASV_12	WM1	0.0323311	WM1	WM	No	No	Bacteria	Firmicutes	Bacilli	Lactobacillales	Streptococcaceae	Streptococcus			ASV_10	WM1	0.00555084	WM1	WM	No	No	Fungi	Basidiomycota	Tremellomycetes	Tremellales	Bulleribasidiaceae	Vishniacozyma
	ASV_12	WM2	0.0269671	WM2	WM	No	No	Bacteria	Firmicutes	Bacilli	Lactobacillales	Streptococcaceae	Streptococcus			ASV_10	WM2	0.00269602	WM2	WM	No	No	Fungi	Basidiomycota	Tremellomycetes	Tremellales	Bulleribasidiaceae	Vishniacozyma
	ASV_12	WM3	0.0293763	WM3	WM	No	No	Bacteria	Firmicutes	Bacilli	Lactobacillales	Streptococcaceae	Streptococcus			ASV_10	WM3	0.00336715	WM3	WM	No	No	Fungi	Basidiomycota	Tremellomycetes	Tremellales	Bulleribasidiaceae	Vishniacozyma
	ASV_12	WM4	0.0233595	WM4	WM	No	No	Bacteria	Firmicutes	Bacilli	Lactobacillales	Streptococcaceae	Streptococcus			ASV_10	WM4	0.003903	WM4	WM	No	No	Fungi	Basidiomycota	Tremellomycetes	Tremellales	Bulleribasidiaceae	Vishniacozyma
	ASV_12	WM5	0.0315797	WM5	WM	No	No	Bacteria	Firmicutes	Bacilli	Lactobacillales	Streptococcaceae	Streptococcus			ASV_10	WM5	0.00556504	WM5	WM	No	No	Fungi	Basidiomycota	Tremellomycetes	Tremellales	Bulleribasidiaceae	Vishniacozyma
	ASV_12	WM6	0.0232441	WM6	WM	No	No	Bacteria	Firmicutes	Bacilli	Lactobacillales	Streptococcaceae	Streptococcus			ASV_10	WM6	0.00324459	WM6	WM	No	No	Fungi	Basidiomycota	Tremellomycetes	Tremellales	Bulleribasidiaceae	Vishniacozyma

## Sheet: S4
			Relative abundance of the top 10 genera with significant differences
			Genus	BG	BM	WG	WM			Genus	BG	BM	WG	WM
			Acinetobacter	0.00546365	0.0360319	0.302331	0.068169			Alternaria	0.0319319	0.00587355	0.647445	0.739122
			Anoxybacillus	0.0104671	0.0593792	0.103155	0.107352			Aureobasidium	0.00632549	0.00181435	0.0972545	0.0324346
			Bacillus	0.0230294	0.158012	0.249805	0.405378			Botryosphaeria	0.932338	0.984269	0.00530461	0.00880548
			Clostridium_sensu_stricto_18	0.0052347	0.0357909	0.0612191	0.0668719			Bullera	7.74372e-05	0.000156639	0.0121758	0.00335277
			Klebsiella	0.00279443	0.0169916	0.0286005	0.0255831			Didymella	0.000303817	0.000507258	0.0234584	0.082158
			Methylobacterium	0.00971593	0.00578085	0.00629478	0.0494868			Mycosphaerella	0.00945181	0.00230208	0.0808957	0.0836752
			Pantoea	0.00275821	0.0149614	0.0276393	0.017886			Penicillium	6.15686e-06	4.04709e-06	0.00215309	4.60292e-06
			Pseudomonas	0.916184	0.362931	0.0161811	0.0167575			Rhodotorula	3.10834e-05	2.01266e-06	0.0136622	2.12244e-06
			Staphylococcus	0.000654731	0.160181	0.00208211	0.00368144			Schizophyllum	0.00994199	1.00584e-05	6.96066e-05	2.66211e-05
			Streptococcus	0.00240283	0.0153552	0.0222871	0.0278097			Vishniacozyma	0.00523064	0.00234511	0.0560336	0.00405444

## Sheet: S5
	Genus	BG1	BG2	BG3	BG4	BG5	BG6	BM1	BM2	BM3	BM4	BM5	BM6	WG1	WG2	WG3	WG4	WG5	WG6	WM1	WM2	WM3	WM4	WM5	WM6
	Bacteria|Proteobacteria|Gammaproteobacteria|Pseudomonadales|Pseudomonadaceae|Pseudomonas	91.8373	91.3309	90.7927	91.7984	91.7302	91.848	30.9772	35.1418	38.4015	34.1801	38.2314	38.1095	0.639096	1.1177	1.36263	1.11937	0.980306	1.08755	1.18236	1.1324	1.14058	0.995422	1.39971	0.976382

## Sheet: S6
	Genus	p-values	p-values (corrected)
	Bacteria|Actinobacteria|Actinobacteria|Micrococcales|Microbacteriaceae|Unassigned	0.000180892	0.000783864
	Bacteria|Firmicutes|Bacilli|Bacillales|Bacillaceae|Anoxybacillus	0.000180892	0.000671883
	Bacteria|Firmicutes|Bacilli|Bacillales|Bacillaceae|Bacillus	7.90046e-05	0.00205412
	Bacteria|Firmicutes|Bacilli|Bacillales|Family_X|Thermicanus	0.0012599	0.00142424
	Bacteria|Firmicutes|Bacilli|Bacillales|Paenibacillaceae|Paenibacillus	9.90881e-05	0.000858763
	Bacteria|Firmicutes|Bacilli|Bacillales|Staphylococcaceae|Staphylococcus	0.000203474	0.000587813
	Bacteria|Firmicutes|Bacilli|Lactobacillales|Lactobacillaceae|Lactobacillus	0.000255767	0.000474996
	Bacteria|Firmicutes|Bacilli|Lactobacillales|Leuconostocaceae|Leuconostoc	0.000653094	0.000893708
	Bacteria|Firmicutes|Bacilli|Lactobacillales|Leuconostocaceae|Weissella	0.000215453	0.000430906
	Bacteria|Firmicutes|Bacilli|Lactobacillales|Streptococcaceae|Lactococcus	0.000340295	0.000552979
	Bacteria|Firmicutes|Bacilli|Lactobacillales|Streptococcaceae|Streptococcus	0.000129504	0.000841775
	Bacteria|Firmicutes|Clostridia|Clostridiales|Clostridiaceae_1|Clostridium_sensu_stricto_18	0.000150889	0.000784623
	Bacteria|Firmicutes|Clostridia|Clostridiales|Ruminococcaceae|Ruminococcaceae_UCG-005	0.000299752	0.00051957
	Bacteria|Proteobacteria|Alphaproteobacteria|Rhizobiales|Methylobacteriaceae|Methylobacterium	0.000215453	0.000466815
	Bacteria|Proteobacteria|Alphaproteobacteria|Sphingomonadales|Sphingomonadaceae|Sphingomonas	0.00541582	0.00563245
	Bacteria|Proteobacteria|Gammaproteobacteria|Enterobacteriales|Enterobacteriaceae|Escherichia-Shigella	0.00334329	0.0036219
	Bacteria|Proteobacteria|Gammaproteobacteria|Enterobacteriales|Enterobacteriaceae|Klebsiella	0.000210713	0.00049805
	Bacteria|Proteobacteria|Gammaproteobacteria|Enterobacteriales|Enterobacteriaceae|Pantoea	0.00118133	0.00139612
	Bacteria|Proteobacteria|Gammaproteobacteria|Enterobacteriales|Enterobacteriaceae|Raoultella	0.000547162	0.000836837
	Bacteria|Proteobacteria|Gammaproteobacteria|Enterobacteriales|Enterobacteriaceae|Unassigned	0.0487034	0.0487034
	Bacteria|Proteobacteria|Gammaproteobacteria|Oceanospirillales|Halomonadaceae|Unassigned	0.000204771	0.000532406
	Bacteria|Proteobacteria|Gammaproteobacteria|Oceanospirillales|Halomonadaceae|Zymobacter	0.00101548	0.00125726
	Bacteria|Proteobacteria|Gammaproteobacteria|Pseudomonadales|Moraxellaceae|Acinetobacter	7.90046e-05	0.00102706
	Bacteria|Proteobacteria|Gammaproteobacteria|Pseudomonadales|Moraxellaceae|Moraxella	0.000579202	0.000836625
	Bacteria|Proteobacteria|Gammaproteobacteria|Pseudomonadales|Pseudomonadaceae|Pseudomonas	0.000189729	0.00061662
	Bacteria|Proteobacteria|Gammaproteobacteria|Vibrionales|Vibrionaceae|Vibrio	0.000717986	0.000933382

## Sheet: S7
	BBEAs								WWSAs								PAs
	ID	log2FC	log2CPM	PValue	FDR	level			ID	log2FC	log2CPM	PValue	FDR	level			OTUID	Kingdom	Phylum	Class	Order	Family	Genus
	ASV_2	3.923	20.26	6.6156e-131	3.17549e-129	Enriched			ASV_38	0.789	11.44	0.053388	0.175636	NotSig			ASV_2	Bacteria	Proteobacteria	Gammaproteobacteria	Pseudomonadales	Pseudomonadaceae	Pseudomonas
	ASV_16	4.653	12.938	7.90769e-14	6.32615e-13	Enriched			ASV_8	-0.731	11.452	0.0548862	0.175636	NotSig			ASV_58	Bacteria	Proteobacteria	Gammaproteobacteria	Pseudomonadales	Pseudomonadaceae	Pseudomonas
	ASV_46	4.327	10.045	2.87473e-12	1.97124e-11	Enriched			ASV_11	0.404	14.928	0.0964028	0.289208	NotSig			ASV_69	Bacteria	Proteobacteria	Gammaproteobacteria	Pseudomonadales	Pseudomonadaceae	Pseudomonas
	ASV_36	2.704	11.59	3.85273e-11	2.31164e-10	Enriched			ASV_28	0.48	12.374	0.115052	0.324853	NotSig			ASV_105	Bacteria	Proteobacteria	Gammaproteobacteria	Pseudomonadales	Pseudomonadaceae	Pseudomonas
	ASV_22	1.54	10.982	6.24246e-06	2.99638e-05	Enriched			ASV_41	-0.605	11.357	0.137966	0.36791	NotSig			ASV_89	Bacteria	Proteobacteria	Gammaproteobacteria	Pseudomonadales	Pseudomonadaceae	Pseudomonas
	ASV_51	4.588	5.588	0.00021913	0.000876521	Enriched			ASV_44	0.574	11.276	0.152824	0.37379	NotSig			ASV_99	Bacteria	Proteobacteria	Gammaproteobacteria	Pseudomonadales	Pseudomonadaceae	Pseudomonas
	ASV_42	2.98	7.185	0.0218989	0.0808576	Enriched			ASV_40	-0.569	11.258	0.165914	0.379231	NotSig			ASV_224	Bacteria	Proteobacteria	Gammaproteobacteria	Pseudomonadales	Pseudomonadaceae	Pseudomonas
									ASV_50	-0.305	10.861	0.20736	0.446459	NotSig			ASV_203	Bacteria	Proteobacteria	Gammaproteobacteria	Pseudomonadales	Pseudomonadaceae	Pseudomonas
									ASV_13	0.308	13.997	0.213928	0.446459	NotSig			ASV_230	Bacteria	Proteobacteria	Gammaproteobacteria	Pseudomonadales	Pseudomonadaceae	Pseudomonas
									ASV_52	-0.438	11.261	0.224218	0.448437	NotSig			ASV_323	Bacteria	Proteobacteria	Gammaproteobacteria	Pseudomonadales	Pseudomonadaceae	Pseudomonas
									ASV_36	-0.814	10.137	0.248942	0.477969	NotSig			ASV_292	Bacteria	Proteobacteria	Gammaproteobacteria	Pseudomonadales	Pseudomonadaceae	Pseudomonas
									ASV_35	-0.365	12.028	0.26782	0.494436	NotSig			ASV_330	Bacteria	Proteobacteria	Gammaproteobacteria	Pseudomonadales	Pseudomonadaceae	Pseudomonas
									ASV_5	0.163	16.862	0.35423	0.607252	NotSig			ASV_865	Bacteria	Proteobacteria	Gammaproteobacteria	Pseudomonadales	Pseudomonadaceae	Pseudomonas
									ASV_19	0.174	13.58	0.396206	0.633929	NotSig			ASV_467	Bacteria	Proteobacteria	Gammaproteobacteria	Pseudomonadales	Pseudomonadaceae	Pseudomonas
									ASV_10	0.109	15.599	0.525167	0.759706	NotSig			ASV_789	Bacteria	Proteobacteria	Gammaproteobacteria	Pseudomonadales	Pseudomonadaceae	Pseudomonas
									ASV_27	0.158	12.644	0.543945	0.759706	NotSig			ASV_644	Bacteria	Proteobacteria	Gammaproteobacteria	Pseudomonadales	Pseudomonadaceae	Pseudomonas
									ASV_55	-0.209	10.896	0.547072	0.759706	NotSig			ASV_1110	Bacteria	Proteobacteria	Gammaproteobacteria	Pseudomonadales	Pseudomonadaceae	Pseudomonas
									ASV_18	0.152	13.451	0.557741	0.759706	NotSig			ASV_621	Bacteria	Proteobacteria	Gammaproteobacteria	Pseudomonadales	Pseudomonadaceae	Pseudomonas
									ASV_7	0.096	16.14	0.56978	0.759706	NotSig			ASV_633	Bacteria	Proteobacteria	Gammaproteobacteria	Pseudomonadales	Pseudomonadaceae	Pseudomonas
									ASV_3	0.092	18.081	0.588688	0.763703	NotSig			ASV_575	Bacteria	Proteobacteria	Gammaproteobacteria	Pseudomonadales	Pseudomonadaceae	Pseudomonas
									ASV_2	0.104	13.596	0.654236	0.796977	NotSig			ASV_1026	Bacteria	Proteobacteria	Gammaproteobacteria	Pseudomonadales	Pseudomonadaceae	Pseudomonas
									ASV_30	0.191	12.164	0.662284	0.796977	NotSig			ASV_659	Bacteria	Proteobacteria	Gammaproteobacteria	Pseudomonadales	Pseudomonadaceae	Pseudomonas
									ASV_37	-0.468	5.783	0.664148	0.796977	NotSig			ASV_723	Bacteria	Proteobacteria	Gammaproteobacteria	Pseudomonadales	Pseudomonadaceae	Pseudomonas
									ASV_54	0.13	11.33	0.687796	0.805225	NotSig			ASV_1093	Bacteria	Proteobacteria	Gammaproteobacteria	Pseudomonadales	Pseudomonadaceae	Pseudomonas
									ASV_26	-0.089	12.531	0.778156	0.889321	NotSig
									ASV_21	0.06	13.186	0.799116	0.892037	NotSig
									ASV_59	0.064	11	0.854214	0.909952	NotSig
									ASV_33	-0.051	12.038	0.877032	0.909952	NotSig
									ASV_12	-0.035	14.1	0.881859	0.909952	NotSig
									ASV_20	0.033	13.449	0.890994	0.909952	NotSig
									ASV_34	0.01	12.244	0.97582	0.97582	NotSig
				BBEAs（BG : BM-enriched ASVs）;
				WWSAs（WG–WM stable ASVs）
				PAs (Pseudomonas-related ASVs)

## Sheet: S8
	ASV_ID	Identity to Isolate(%)	Isolate	Closest Species (Type strain)	Identity to Closest(%)
	ASV_2	100	aNRL1	Pseudomonas tolaasii ATCC 33618T	0.9914
